# 1 **Small-field visual projection neurons detect translational optic flow and** 2 **support walking control**

3 Mathew D. Isaacson \*\*, Jessica L. M. Eliason \*\*, Aljoscha Nern \*, Edward M. Rogers, Gus K.  
4 Lott \*\*, Tanya Tabachnik \*\*, William J. Rowell \*\*, Austin W. Edwards \*\*, Wyatt L. Korff, Gerald  
5 M. Rubin, Kristin Branson, and Michael B. Reiser #

6 Janelia Research Campus, Howard Hughes Medical Institute; Ashburn, VA, USA

7

8 \* Contributed equally

9 \*\* Current addresses: M.D.I.: Department of Biomedical Engineering, Cornell University; Ithaca, NY, USA;

10 J.L.M.E.: Academies of Loudoun, Leesburg, VA, USA; G.L.K.: Telestai Research Institute, Syracuse, NY, USA;

11 T.T.: Zuckerman Institute, Columbia University, NY, USA; W.J.R.: Pacific Biosciences, Inc., Menlo Park, CA,

12 USA; and A.W.E.: Biological Imaging Development CoLab, UC San Francisco, San Francisco, CA, USA

13 # correspondence: reiser@m@janelia.hhmi.org

14

## 15 **SUMMARY**

16 Animals rely on visual motion for navigating the world, and research in flies has clarified how  
17 neural circuits extract information from moving visual scenes. However, the major pathways  
18 connecting these patterns of optic flow to behavior remain poorly understood. Using a high-  
19 throughput quantitative assay of visually guided behaviors and genetic neuronal silencing, we  
20 discovered a region in *Drosophila*'s protocerebrum critical for visual motion following. We used  
21 neuronal silencing, calcium imaging, and optogenetics to identify a single cell type, LPC1, that  
22 innervates this region, detects translational optic flow, and plays a key role in regulating forward  
23 walking. Moreover, the population of LPC1s can estimate the travelling direction, such as when  
24 gaze direction diverges from body heading. By linking specific cell types and their visual  
25 computations to specific behaviors, our findings establish a foundation for understanding how  
26 the nervous system uses vision to guide navigation.

27

## 28 **INTRODUCTION**

29 The global pattern of perceived visual motion, termed optic flow<sup>1</sup>, provides rich information  
30 about the structure of an observer's local environment. The fruit fly, *Drosophila melanogaster*, is  
31 a prominent model system for establishing the circuit implementation of visual computations and  
32 for linking these computations to behavioral control<sup>2</sup>. When flies move through an environment,

33 the pattern of optic flow they experience contains information about their own movement, the  
34 layout of the surrounding environment, and the relative movement of nearby objects in their field  
35 of view<sup>1,3</sup>. These motion cues are used to stabilize the fly's heading<sup>4,5</sup>, track objects<sup>6,7</sup>, or avoid  
36 collisions<sup>8,9</sup>, and these different behavioral reactions have long suggested that distinct neuronal  
37 circuits can distinguish between different patterns of motion.

38

39 Much progress has been made towards identifying the circuits and algorithms that compute the  
40 local direction of motion in *Drosophila*<sup>10-15</sup>. In the fly visual system, two 4<sup>th</sup> order neurons, T4  
41 and T5, are the first cells that exhibit directionally selective signals. T4 neurons encode the  
42 motion of bright (ON) edges, while T5 encode the motion of dark (OFF) edges. The four  
43 subtypes of T4 and T5 neurons are each selective for one cardinal direction and terminate in one  
44 of four retinotopic layers of the lobula plate<sup>16-19</sup>. Several groups have used genetic targeting of  
45 individual cell types in the visual motion pathway and measured robust, specific effects of  
46 neuronal silencing on visual motion guided behaviors<sup>6,20,21</sup>. However, these studies have  
47 generally analyzed the contributions of early visual system neurons up to and including T4 and  
48 T5. Establishing causal links between visual processing by output neurons of the lobula plate or  
49 their targets in the central brain, and behavioral control has proven far more challenging, likely  
50 because these outputs are a large, diverse set of neurons, most of which cannot be routinely  
51 accessed using precise genetic tools and have therefore not been carefully examined.

52

53 A group of neurons spanning large regions of the lobula plate, the Lobula Plate Tangential (LPT)  
54 neurons, have been extensively characterized in larger flies, most notably in *Calliphora*. The  
55 lobula plate is organized retinotopically, so neurons with large dendritic arbors are expected to  
56 respond to visual motion over large parts of the eye. Indeed, this group of uniquely identifiable  
57 neurons encode 'wide field' optic flow and project to the central brain<sup>22,23</sup>. The best  
58 characterized LPTs, the HS (horizontal system) and VS (vertical system) neurons, are primarily  
59 tuned to the pattern of visual motion induced by rotations of the body and/or head<sup>24</sup>. The HS and  
60 VS cells have also been characterized in *Drosophila*<sup>25</sup>. However, silencing these rotation-  
61 selective neurons using genetic methods has not eliminated the behavioral turning responses to  
62 rotational visual motion<sup>26</sup>, but has revealed effects on head movements<sup>27</sup>. One possibility is that  
63 these large neurons are specialized for gaze-stabilizing head control movements<sup>27-29</sup>, consistent

64 with their tuning for rotational movement, while groups of cells distinct from the well-studied  
65 VS and HS cells transduce the visual signals used for body navigation.

66

67 While rotational optic flow is clearly important for stabilizing an animal's gaze and heading  
68 direction, detecting and regulating translational optic flow is critical for navigating through an  
69 environment, as occurs in goal-directed behavior towards objects such as conspecifics, food  
70 sources, or refuge<sup>1,3</sup>. Yet very little is known about neurons specialized for encoding the flow  
71 fields arising from translational motion. Such neurons are presumably essential for regulating  
72 forward locomotion, an exploratory behavior whose visual control is surprisingly complex<sup>5,9,30–</sup>  
73 <sup>32</sup>. Using genetic silencing, the visual control of forward-walking has been attributed to the  
74 T4/T5 pathway<sup>33</sup>, but these neurons only detect motion within a small field of view, so it is not  
75 known which neurons downstream of T4/T5 are selective for translational motion and participate  
76 in regulating forward locomotion. In blowflies, several cells (presumed to be LPTs) have been  
77 recently discovered to be selective for the visual motion corresponding to sideways and upwards  
78 translation<sup>34</sup>. However, no forward or backward translation-selective neurons have been  
79 described. In addition to the large LPTs, small field neurons projecting from the lobula plate to  
80 'optic glomeruli' in the central brain have been described in blowflies<sup>35</sup> (and recently found in  
81 *Drosophila* EM connectome data<sup>36</sup>), but due to their small size, the analysis of their functional  
82 properties has not been possible in large flies.

83

84 In this study, we describe a systematic approach to mapping neurons required for the visual  
85 regulation of locomotion in *Drosophila melanogaster*. We first set out to identify candidate brain  
86 regions required for the visual control of walking with a neuroanatomical silencing screen  
87 making use of a high-throughput assay. Our approach is analogous to the loss-of-function genetic  
88 screens that have been used extensively in *Drosophila* to identify genes required for particular  
89 functions<sup>37</sup>. Applying a recently established analytical method we found a specific region in the  
90 protocerebrum as a critical step in the transduction of visual signals into behavioral actions. We  
91 then identified several small-field Visual Projection Neurons (VPNs) innervating this region and  
92 developed specific genetic tools for targeting these cells. From this detailed anatomical analysis,  
93 we identified a single cell type, LPC1, that we further investigated using neuronal silencing,  
94 activation, and calcium imaging. This cell type strongly links the detection of translational optic

95 flow to the control of forward walking, providing a foundation for understanding how visual  
96 motion is processed to regulate behavior.

97

## 98 **RESULTS**

99

### 100 **Localizing the neuroanatomical correlates of visuomotor behavior**

101

102 To identify neurons that contribute to transforming visual motion to behavior, we developed a  
103 platform that integrates multiple visuo-motor behaviors, individually established in previous  
104 studies<sup>32,38–40</sup>, that was optimized for high-throughput operation. In our Fly Vision Box, groups  
105 of 10-15 flies were placed in clear plastic corridors (tubes) inside of a temperature-controlled,  
106 light-tight box. The box holds 6 such corridors. Along either side of each tube, a row of 64 green  
107 LEDs presented drifting visual motion patterns. Each tube was capped with a transparent block  
108 such that the flies could see a pair of green and UV LEDs, aligned with the ends of the tubes, that  
109 were illuminated to examine phototaxis and color preference behavior. The box also contained a  
110 pair of vibrating motors that were used to startle the flies at the start of each trial. An on-board  
111 microcontroller scheduled events, at 1 ms intervals, pre-specified in an experimental protocol—  
112 including the activation of different LEDs and triggers for each camera frame. An infrared (IR)  
113 backlight below the corridors enabled high-contrast visualization of the flies walking in the  
114 transparent tubes. Videos were acquired at 25 Hz with an IR-sensitive camera mounted above,  
115 that recorded through an IR-pass window that blocked visible light from entering (further details  
116 in methods; Fig. 1A). Offline tracking of the flies in the recorded videos was used to measure the  
117 reactions of the group of flies within each tube. The summarized walking behavior from a typical  
118 experiment shows the consistent directional reactions of the flies to gratings moving with  
119 different speeds and in opposite directions (Fig. 1B). In developing the assay, we were impressed  
120 by two features of the visual motion response (Fig. 1C, S1A): (1) for a given genotype, the  
121 averaged behavior of groups of flies was remarkably consistent across experiments, and (2) the  
122 flies' behavior is tuned to the speed of the visual grating pattern with a temporal frequency  
123 tuning—peaking between 8 and 20 Hz—that agrees well with measurement from much more  
124 laborious experiments, such as single-fly tethered flight<sup>41,42</sup> or walking<sup>13,43</sup>. A further,  
125 noteworthy feature of these responses is that flies exhibited a 'reverse-optomotor' response, that

126 is they preferred to walk not with, but against the direction of visual motion. Such a response has  
127 been described in similar assays<sup>32</sup> but is at odds with predictions based on the so-called (syn-  
128 directional) ‘optomotor’ behavior that is routinely studied in response to rotational visual  
129 motion<sup>4</sup>.

130

131 2,157 ‘generation 1’ GAL4 driver lines<sup>44</sup>, were crossed to *UAS-Shibire<sup>ts1</sup>*, a temperature-sensitive  
132 ortholog of dynamin that blocks chemical synaptic transmission at elevated temperatures<sup>45</sup>, and  
133 the F1 offspring were successfully run through a compact protocol in the Fly Vision Box  
134 (warmed to 34° C; nearly all lines were run multiple times, 4144 total experiments). Many lines  
135 exhibited reduced visual and/or walking responses when compared to the control genotype (an  
136 ‘empty’ GAL4 line crossed to *Shibire<sup>ts1</sup>* run throughout the screen for a total of 729 experiments;  
137 Fig. 1D). For example, 540 lines showed a reduced response to visual motion (below the lower  
138 horizontal red line; < mean – 1 s.d. of the control response). The set of lines screened were  
139 selected from a larger collection of transgenic lines whose expression patterns were previously  
140 characterized<sup>44</sup>. While the lines drive expression in neurons throughout the brain, for some lines  
141 we could readily identify expression in specific visual neuron types, for example in L1 and L2,  
142 the Lamina Monopolar Cells that convey photoreceptor inputs into the motion pathway, and in  
143 T4/T5, the directionally selective cells. As expected, most (>2/3) of the lines we identify with  
144 expression in these cells exhibited visual motion deficits, and stronger expression, such as in  
145 both L1 and L2 together, lead to even stronger phenotypes (Fig. 1D). However, this approach to  
146 analyzing these results is limited since (1) not all lines expressing in a particular cell type  
147 produced consistent phenotypes, (2) many lines without expression in “obvious” candidate cell  
148 types showed behavioral deficits, and (3) using current methods, the identification of all cell  
149 types expressed in 1000s of GAL4 lines is a nearly impossible task.

150

151 To overcome these limitations, we used a recently developed analytical method<sup>46</sup>, that identifies  
152 anatomical components of expression patterns that correlate with specific behavioral phenotypes.  
153 In the previous study, this analysis was developed for correlating locomotion and social behavior  
154 phenotypes to patterns of activated neurons<sup>46</sup>, while here we apply the identical experimental  
155 framework (using the software developed in the previous study and a nearly overlapping set of  
156 GAL4 driver lines) for correlating visual behavior phenotypes to expression patterns of neurons

157 with suppressed synaptic transmission. The outcome of this analysis is a Behavior-Anatomy  
158 Correlation Map (BACM) for each behavioral metric. Two such maps, one for reduction in  
159 walking speed in the dark, and a second for the directional response to fast motion, are shown in  
160 Fig. 1E (with related BACMs in Fig. S1E-G, see methods for details of BACM generation). As  
161 was seen in many BACMs from the previous study<sup>46</sup>, different behavioral metrics have very  
162 different corresponding maps. Reduced walking in the dark correlates with silencing neurons  
163 with expression in the Suboesophageal Zone (SEZ), central complex, and the antenna lobes. As  
164 expected, the BACM for reduced visual motion responses shows a strong contribution from optic  
165 lobe expression, as well as multiple ‘hot spots’ in the central brain. Among these, we identified a  
166 subregion of the posterior lateral protocerebrum (PLP). While the labeling of this PLP region in  
167 the BACM could represent the aggregate contribution of many cell types, we nevertheless  
168 wondered whether a single pathway, or possibly a single cell type, might disproportionately  
169 account for the behavioral deficits associated with this structure. This ‘hotspot’ (white arrows in  
170 Fig. 1E) is distinct from the optic glomeruli receiving input from columnar lobula VPNs<sup>47–50</sup> and  
171 also did not match the location of the terminals of HS and VS axon terminals, suggesting  
172 contributions of other cell types. We examined the expression patterns of GAL4 lines that  
173 contributed to this this feature of the BACM (some examples in Fig. 1F) and found that several  
174 included populations of large numbers of similar neurons projecting from the lobula plate to the  
175 PLP (one such population shown with overlap, Fig. 1G). Small field lobula plate VPNs have  
176 been reported in multiple fly species<sup>16,35,36,47,48</sup>, including *Drosophila*, but their function and  
177 detailed anatomy is only recently being explored<sup>9,18,36,51</sup>.

178

### 179 **Small-field visual projection neurons of the Lobula Plate**

180

181 As a basis for the further study of small-field lobula plate projection neurons and their possible  
182 contributions to visual motion guided behavior, we first examined potential subtypes of this  
183 group. Using anatomical criteria, we were able to distinguish five types of columnar lobula plate  
184 projection neurons (Fig. 2), considerably more than previously described by light microscopy in  
185 *Drosophila*<sup>47,48</sup>. This analysis preceded the recent completion and cataloging of cell types in the  
186 Hemibrain EM volume<sup>36</sup>, which corroborated the presence and general projection pattern of the  
187 five cell types in the central brain. Subsequently, a detailed study of lobula plate connectivity

188 further corroborated the presence of 5 distinct small-field cell-types based on innervation  
189 patterns of that neuropil<sup>18</sup>. Our light microscopy analysis was important for the annotation of  
190 these neurons in both EM volumes, which only contain a small part of the optic lobe or lack the  
191 central brain, respectively.

192

193 Two of these cell types, called LPC1 and LPC2 (for Lobula Plate Columnar type 1 and type 2),  
194 innervate the lobula plate but not the lobula, while the other three, referred to as LLPC1, LLPC2  
195 and LLPC3 (Lobula-Lobula Plate Types 1,2, and 3), send processes to the lobula in addition to  
196 the lobula plate (Fig. 2A-E, Fig. S2A-D). All five types share several anatomical features that  
197 distinguish them from other lobula and lobula plate projection neurons: all are small-field  
198 neurons, innervate specific lobula plate layers<sup>18</sup>, have cell bodies in the lobula plate cell body  
199 rind, and send axons from the posterior side of the lobula plate to the same distinct neuropile  
200 structure in the PLP which we refer to as the LPC glomerulus (Fig. 2A-E, Fig. S2A-D). Each cell  
201 type forms a population of ~100 near-isomorphic neurons on each side of the brain. Dendrites of  
202 individual LPC and LLPC neurons span at most 10% of the retinotopic extent of the lobula plate  
203 (Fig. 2F,J, Fig. S2A-H). From this, we estimate these neurons to be sensitive to visual motion  
204 within a ~20°-wide receptive field. Cell-type specific features of these neurons include the  
205 position of their terminals within the LPC glomerulus (Fig. 2A,G), the presence or absence of a  
206 lobula branch (Fig. 2A-E) and the innervation of distinct lobula plate layers (Fig. 2H,I,K). Since  
207 lobula plate layers are defined by the axon terminals of T4/T5 subtypes that each encode one of  
208 four directions of motion<sup>16,17,19</sup> (Fig. 2H), the distinct layer patterns of each LPC and LLPC cell  
209 type (Fig. 2K) and recent connectivity data<sup>18</sup>, suggest that each subtype may selectively encode  
210 motion in a specific direction. For example, LPC1 cells primarily overlap and receive synaptic  
211 inputs<sup>18</sup> from layer 2 T4/T5 neurons (Fig. 2H,I,K), which encode back-to-front motion.

212

213 To test the functional predictions of these anatomical findings, we developed split-GAL4<sup>52,53</sup>  
214 genetic driver lines for selectively targeting LPC and LLPC cell type (Fig. 3A, Fig. S3). These  
215 LPC and LLPC split-GAL4 lines were used to confirm and extend our anatomical analysis. To  
216 examine their behavioral roles, we crossed each split-GAL4 lines to *UAS-Shibire<sup>ts1</sup>* and ran the  
217 F1 offspring through an extended protocol in the Fly Vision Box (see Methods). We found that  
218 LPC1-silenced flies showed significant, strongly diminished visual motion responses, while no

219 other driver lines yielded substantial deficits across different stimulus conditions, although LPC2  
220 silencing resulted in somewhat enhanced responses to visual motion (Fig. 3B). Using  
221 simultaneous expression of both Shibire<sup>ts1</sup> and Kir2.1, which is expected to yield a more  
222 complete blockade of neuronal function by interfering with both synaptic transmission and  
223 membrane excitability, we obtained significant, strong deficits in the motion following behaviors  
224 across a range of stimulus conditions, for three different LPC1 split-GAL4 driver lines (Fig.  
225 S3A,B). Overall, these anatomical and behavioral results identify LPC1 neurons as  
226 disproportionately contributing to the Behavior-Anatomy Correlation Map's hotspot in the PLP  
227 (Fig. 1E,G; hereon identified as the LPC glomerulus). Based on a recent transcriptomic study of  
228 many optic lobe cell types<sup>54</sup>, LPC1 neurons are expected to provide cholinergic input to their  
229 targets in the glomerulus, suggesting they form an important, excitatory pathway for relaying  
230 visual motion information to the central brain.

231

### 232 **LPC1 neurons play a critical role in the behavioral response to back-to-front translational** 233 **motion**

234 Flies walking in the Vision Box will experience some rotational optic flow, especially when they  
235 are changing direction (turning), but their dominant visual experience will be of translational  
236 optic flow (Fig. 4A). Because of this, the effect of silencing LPC1 neurons could either be due to  
237 a deficiency in the visual guidance of re-orientation or of forward walking, or both. In order to  
238 uncover how LPC1 neurons contribute to reduced following of visual motion (Fig. 3A, Fig.  
239 S3A), we examined the behavior of individual tethered flies walking on an air supported ball<sup>55</sup>  
240 responding to visual stimuli presented on a cylindrical LED display<sup>56</sup>. In contrast to the Fly  
241 Vision Box, the tethered fly experiments allow precise control over the visual experience of each  
242 fly together with higher resolution measurements of walking behaviors.

243

244 When large-field rotational visual motion was presented to tethered walking flies ('empty-split'  
245 control genotype), they slowed down while simultaneously turning in the direction of the rotating  
246 motion (Fig. 4B, left; summary for multiple speeds and results of statistical tests in Fig. S4),  
247 exhibiting the stabilizing reaction referred to as the optomotor response<sup>4</sup>. In comparison to  
248 control flies, silencing LPC1 neurons had no effect on either the turning or the slowing down  
249 components of the rotational optomotor response. Considering the strong effect of silencing



250 LPC1 on visual motion following in the transparent corridors of the Fly Vision Box, we reasoned  
251 that perhaps a different ‘optomotor’ reaction was relevant for this visual condition, one that is  
252 downstream of the detection of visual translation as opposed to visual rotation. To investigate  
253 this possibility, we exposed flies to the simplest visual stimuli that approximate forward or  
254 backward translational optic flow—two opposing halves of a rotational optic flow field (either  
255 front-to-back or back-to-front) for each eye. These right-left symmetric stimuli did not result in  
256 consistent directional turning, but both caused control flies to reduce their forward walking (in  
257 agreement with recent work<sup>33</sup>). Remarkably, the reduction in forward walking in response to fast  
258 back-to-front, but not front-to-back, motion was abolished when the LPC1 neurons were silenced  
259 (Fig. 4B and Fig. S4).

260  
261 To better understand how the organization of optic flow contributes to the effect of silencing  
262 LPC1 neurons, we divided these stimuli into their constituent left and right halves and presented  
263 them individually to tethered flies. In response to monocular back-to-front and front-to-back  
264 motion (Fig. 4B, right), control flies slowed down and turned (in the direction of motion, larger  
265 for the back-to-front stimulus; other speeds in Fig. S4). The flies with LPC1 silenced exhibited a  
266 significantly reduced slowdown in response to back-to-front motion, while their other behavioral  
267 reactions, including turning to this same stimulus, and walking and turning to front-to-back  
268 motion, were unaffected (Fig. S4, right). This result suggests that LPC1 neurons mediate  
269 behavioral reactions specifically to back-to-front visual motion, and that the behavioral  
270 consequence of LPC1 activity may primarily contribute to the regulation of forward walking  
271 speed, and not to the body turning that is also evoked by the same visual stimulus.

272  
273 To further probe the specificity of the LPC1-silencing effect, we examined responses to a set of  
274 translational optic flow fields that correspond to cases when the direction of gaze is not aligned  
275 with the direction of translation (looking in one direction while moving in another, recently  
276 examined in the context of coordinate transformations in the central complex<sup>57</sup>). To simulate this  
277 visual condition, we presented a panoramic pattern consisting of motion emanating from a Focus  
278 of Expansion (FoE), positioned at multiple azimuthal locations. In response to this panoramic  
279 translational motion (several examples in Fig. 4C), control flies slowed down and turned away  
280 from the FoE (turning behavior remarkably similar to that measured in flying flies<sup>31</sup>). The effects

281 of silencing LPC1 are strikingly specific, with a significant reduction in the slowing down  
282 reaction, but without any effect on turning. Moreover, the lack of slowing down in LPC1-  
283 silenced flies is most prominent in the conditions where large parts of the display showed back-  
284 to-front motion (Fig. 4C, summary). Across this comparative set of visual stimuli, these results  
285 clearly demonstrate that silencing LPC1 neurons leads to a specific deficit in forward walking,  
286 but not turning, in response to back-to-front translational, but not rotational, visual motion.  
287

288 While these silencing effects suggest a simple causal link between the perception of back-to-  
289 front visual motion and the control of forward walking, they do not rule out other scenarios. One  
290 such possibility is that LPC1 cells, in addition to other neurons, also contribute to turning  
291 behaviors, and there is sufficient redundancy and/or complexity in these pathways to mask the  
292 effects of LPC1 silencing. To address this possibility, we set out to isolate the contribution of  
293 LPC1 neurons to walking behaviors using optogenetic activation. However, the synchronous and  
294 simultaneous depolarizations of LPC1 neurons from both eyes could again mask a contribution  
295 to turning behaviors. To avoid this confound, we used a previously developed stochastic genetic  
296 method<sup>47</sup> to target CsChrimson<sup>58</sup> to LPC1 neurons on only one side of the brain. To determine  
297 the expression pattern of each individual fly, we dissected and imaged each animal after the  
298 behavioral experiment. Because this method produces animals with bilateral as well as no  
299 expression, the individuals with these genotypes served as positive and negative controls. We  
300 first wanted to confirm that these flies had similar behavioral reactions to rotational and  
301 translational optic flow, and indeed all three groups of flies (those with either bilateral, unilateral,  
302 or no LPC1 CsChrimson expression) responded similarly (Fig. 4D), and similarly to our control  
303 flies for the silencing experiment (Fig. 4B). To activate CsChrimson with minimal effects on  
304 vision, we used a 660 nm LED coupled to a fiber directed at the head of each tethered fly. In  
305 response to this optogenetic depolarization of LPC1 neurons on both sides, flies reduced their  
306 forward walking (to an approximate stop) without any effect on turning behavior (Fig. 4D, right).  
307 Flies lacking CsChrimson expression did not slow down or turn in response to optogenetic  
308 activation, whereas flies with unilateral CsChrimson expression slowed down nearly as much as  
309 those with bilateral CsChrimson expression. While the population average of the unilateral  
310 CsChrimson flies did not exhibit an LPC1-induced turning behavior, we were careful to note  
311 which side of the brain contained LPC1 neurons expressing CsChrimson. Even when separated

312 by the side of expression (Fig. 4D, right, inset), we find that unilateral LPC1 activation did not  
313 evoke a directional turning bias. These activation results clarify the contribution of LPC1  
314 neurons to behavioral control. The bilateral activation of these excitatory neurons, as would be  
315 experienced by moving backwards relative to a static environment, leads to a slowing down of  
316 forward walking. Activation of these neurons, even on one side of the animal, also leads to  
317 slowing down, but not to turning, consistent with a specific link between back-to-front motion  
318 detection and the control of walking speed.

319

### 320 **LPC1 neurons selectivity encode back-to-front translational visual motion by integrating** 321 **contralateral motion**

322 Visual projections neurons that bridge the optic lobe and the central brain provide a unique  
323 opportunity to understand how selectivity for specific visual features maps onto behavioral  
324 control. Do LPC1 neurons encode back-to-front visual motion as is suggested by their anatomy  
325 (Fig. 2I), connectivity<sup>18</sup>, and our behavioral analysis (Fig. 4B,C)? To determine the visual motion  
326 selectivity of LPC1 neurons, we performed *in vivo* two-photon calcium imaging of the LPC1  
327 population axon terminal bundle (in the glomerulus) while presenting visual motion stimuli (Fig.  
328 5A). In this experimental setup, the fly's head is pitched down, allowing access to the posterior  
329 side of the central brain of flies with GCaMP6m<sup>59</sup> expressed in LPC1 neurons. A recently  
330 designed, higher resolution, cylindrical LED arena<sup>41</sup> was positioned such that it was aligned to  
331 the equator<sup>60</sup> of the fly's eye (Fig. S5A,B). All calcium activity measurements were from the left  
332 LPC1 population, expected to convey ipsilateral visual motion from the left eye.

333

334 We compared the response to moving gratings presented to the left and right eye separately, in  
335 all four cardinal directions. The only detectable responses from the LPC1 glomerulus population  
336 were to back-to-front visual motion presented to the left (ipsilateral) eye (Fig. 5B), consistent  
337 with the anatomical and behavioral predictions. However, the behavioral data does not make a  
338 strong prediction about whether LPC1 neurons might integrate bilateral motion information. The  
339 large effect of silencing LPC1 neurons on bilateral back-to-front motion responses (Fig. 4B,C)  
340 could be attributed to downstream neurons that integrate from both LPC1 populations. To see  
341 whether bilateral information is combined in LPC1 neurons, we presented rotational and  
342 translation motion stimuli spanning both eyes. As expected, the left LPC1 glomerulus responded

343 strongly to back-to-front bilateral visual motion, but not to front-to-back visual motion (Fig. 5C).  
344 Surprisingly, the response to rotational visual motion containing back-to-front visual motion on  
345 the left eye showed a significantly reduced response, suggesting that the global optic flow pattern  
346 influences the response of LPC1 neurons (Fig. 5C). Furthermore, the calcium responses of LPC1  
347 neurons to translational patterns presented with a focus of expansion (FoE) at multiple positions  
348 around the azimuth of the fly's visual field confirm their maximal selectivity for back-to-front  
349 visual motion, with reduced activation for other positions of the FoE (Fig. 5D, left). Remarkably,  
350 this graded response is very similar to the effect of silencing LPC1 neurons on forward walking,  
351 in response to the same stimuli (Fig. 5D, right, comparison to behavioral data adapted from Fig.  
352 4C). Thus, we find LPC1 neurons encode the precise visual stimuli for which we have also  
353 shown them to be behaviorally required.

354

355 The large difference between the LPC1 calcium responses to presentations of translational and  
356 rotational optic flow that both contain the same amount of ipsilateral back-to-front motion (Fig.  
357 5C), suggests that contralateral visual motion modulates the response to ipsilateral motion –  
358 providing global ‘context’ to an otherwise ambiguous visual scene. To probe this mechanism  
359 further, we presented back-to-front ipsilateral visual motion (Fig. 5E, in black) paired with either  
360 contralateral back-to-front motion (mimicking translation, in blue) or front-to-back motion  
361 (mimicking rotation, in red). We note that these contralateral motion stimuli, presented on their  
362 own, did not evoke a detectable calcium response (Fig. 5B), and yet these contralateral visual  
363 inputs modified the response to ipsilateral back-to-front motion (Fig. 5E). LPC1 responses were  
364 significantly enhanced for translation-like stimuli and were significantly reduced for rotational  
365 stimuli, at all tested speeds (Fig. 5E). We further confirmed that this result holds whether the  
366 region of frontal binocular overlap is stimulated or not (Fig. S5C), and that LPC1 neurons  
367 encode translational optic flow regardless of its fine structure (Fig. S5D). Taken together, these  
368 experiments demonstrate that the LPC1 population detects back-to-front visual motion and  
369 integrates contralateral visual motion information to enhance their selectivity for translational, as  
370 opposed to rotational, optic flow.

371

372 **An additional small-field neuron type, LLPC1, encodes translational visual motion with**  
373 **directional selectivity opposite to LPC1 neurons**

374

375 After discovering LPC1's strong preference for translational, back-to-front optic flow, we  
376 wondered whether other small field lobula plate neurons might show similar preference for optic  
377 flow patterns that accompany other types of translational motion. We then examined the  
378 response properties of the Lobula-Lobula Plate Columnar Type 1 cells (LLPC1), which receive  
379 their primary inputs in layer 1 of the lobula plate<sup>18</sup> (Fig. 2I,K) and are therefore expected to  
380 encode the opposite direction of visual motion as LPC1. As with LPC1, their anatomy does not  
381 suggest a specific role in the detection of either translational or rotational visual motion. Perhaps  
382 surprisingly, silencing the LLPC1 neurons did not yield any statistically significant behavioral  
383 phenotype in either the Fly Vision Box (Fig. 3A) or in the fly-on-ball walking assay (Fig. S6).

384

385 We imaged the calcium responses of LLPC1 neurons in the glomerulus, following the methods  
386 and stimulus protocol developed for LPC1 neurons (Fig. 6A). As predicted by their anatomy, and  
387 despite their lack of a strong silencing phenotype, the LLPC1 neurons were selectively activated  
388 by ipsilateral front-to-back motion but not by contralateral visual motion (Fig. 6B). We noted a  
389 modest response to upward motion (Fig. 6B); this response is most likely a contribution of  
390 LLPC2 expression within our LLPC1-split-GAL4 line. LLPC2 axons terminate adjacent to the  
391 LLPC1 axons (Fig. 2G), and further analysis (Fig. S7A-B) showed that the upward motion  
392 response is restricted to a glomerulus region that is distinct from the front-to-back responses. We  
393 thereby have also inadvertently established that LLPC2 neurons, with inputs in layer 3 of the  
394 lobula plate<sup>18</sup> (Fig. 2I,K), have the expected property of encoding upwards visual motion.

395

396 The responses of the LLPC1 neurons to optic flow patterns containing translational visual  
397 motion are remarkably consistent with the LPC1 responses, except that the neurons prefer front-  
398 to-back translational visual motion (Fig. 6C). As with LPC1, the neurons showed a graded  
399 response to translational visual motion presented at different FoE positions, with the peak  
400 response occurring for front-to-back motion (Fig. 6D). Comparing the visual responses of the  
401 LLPC1 neuron to the behavioral effect of silencing this cell type, we find a similar trend, but the  
402 LLPC1 phenotypes do not rise to the level of statistical significance. We therefore cannot rule  
403 out either that the silencing effect is incomplete in these cells, or the parallel contribution of  
404 additional cell types contributing front-to-back visual motion to the control of forward walking.

405 Finally, we found a similar contribution of contralateral visual motion to establishing the  
406 sensitivity for translational visual motion. LLPC1 neurons' response to ipsilateral front-to-back  
407 visual motion was enhanced by contralateral front-to-back motion and suppressed by  
408 contralateral back-to-front motion for all tested speeds (Figs. 6E, S7C). Front-to-back visual  
409 motion is a ubiquitous feature of navigation through any environment and these results establish  
410 LLPC1 neurons as an important sensory pathway for detecting the visual consequence of  
411 forward self-motion together with a mechanism for discarding confounding visual motion during  
412 turning.

413

#### 414 **Cascaded inhibition from neurons tuned to opposite directional motion establishes LPC1's** 415 **selectivity for translation motion**

416 The 'global context' provided by contralateral visual motion modulates the responses of LPC1  
417 and LLPC1 to their ipsilateral visual input, promoting the selectivity for translational optic flow  
418 (Fig. 5E, 6E). A mechanistic explanation for this selectivity would be that these cell types  
419 receive inhibition from neurons encoding contralateral non-preferred motion, which would  
420 explain why we did not see any responses to contralateral motion alone (calcium indicators are  
421 often unreliable reporters of hyperpolarization). Furthermore, the enhancement we observed  
422 when contralateral preferred direction motion was also presented (back-to-front for LPC1 and  
423 front-to-back for LLPC1) could be the excitatory contribution of additional cell types (too weak  
424 to be observed in isolation) or a consequence of reducing the contralateral inhibition.

425

426 This inhibition due to contralateral motion could arise from synaptic inputs onto LPC1 and  
427 LLPC1 cells either in their dendrites in the lobula plate or their axon terminals in the glomeruli  
428 (by separate midline-crossing neurons for each cell type). The lobula plate houses layer-specific  
429 inhibitory neurons<sup>18,61</sup>, but as these neurons would inhibit both the rotation and translation  
430 sensitive outputs of the lobula plate, these seem unlikely to serve a role in promoting  
431 translational optic flow sensitivity. We instead focused on the axon terminals, which could  
432 provide a compact target for the coordinated inhibition of the entire population of small field  
433 neurons. Before the availability of the hemibrain dataset, we undertook a neuroanatomical  
434 exploration of neurons that appear to provide input to the LPC1 glomerulus and examined many  
435 candidate cell types. The most promising cell type we identified in this search is a large neuron,

436 present once per central brain hemisphere, with extensive arbors in both the LPC1 and LLPC1  
437 subregions of the LPC glomerulus (named LPC-IN; Fig. 7A). Synaptic marker expression  
438 suggests that this cell is presynaptic in the LPC1 glomerulus and postsynaptic in the LLPC1  
439 glomerulus and based on the expression of GAD1, is GABAergic, and thus likely inhibitory (Fig.  
440 7B,C,D). This single neuron can be unambiguously matched to a cell named PLP249 in the  
441 hemibrain<sup>36</sup>, and the connectivity data for this cell confirms our predictions for substantial inputs  
442 from LLPC1 neurons and substantial outputs onto LPC1 neurons. LPC-IN is expected to inhibit  
443 LPC1s. To test this, we developed a split-GAL4 line to target LPC-IN and imaged calcium  
444 responses to visual stimuli. We found that LPC-IN primarily encodes ipsilateral front-to-back  
445 motion (Fig. 7B). However, it does not respond to contralateral visual motion and is thus  
446 unlikely to be a source of inhibition due to contralateral visual motion. The anatomy and  
447 response properties of this input neuron suggest it inherits its (front-to-back) visual responses  
448 from LLPC1. Lacking the optic lobes and the contralateral brain hemisphere, the hemibrain data  
449 set is a challenging resource in which to identify this contralateral inhibition pathway, but future  
450 EM resources should reveal this complete circuit. Nevertheless, the identification of this new cell  
451 type establishes another example of the use of inhibition by oppositely tuned neurons for the  
452 generation of response selectivity along the motion pathway—but now well outside of the visual  
453 system (Fig. 7F).

454

## 455 **DISCUSSION**

456 Motion processing in flies is a well-studied field, and yet the primary pathways connecting the  
457 processing of optic flow<sup>1,3</sup>, large patterns of visual motion induced by movement, to the control  
458 of locomotion have not been delineated. Most previous studies have focused on the wide-field  
459 Lobula Plate Tangential Neurons, many of which respond best to rotational visual motion<sup>24,28,62</sup>.  
460 In this study we used a systematic analysis of visual motion response deficits in walking flies  
461 with subsets of neurons silenced, to identify a neuroanatomical locus with a critical contribution  
462 to visual motion behaviors (Fig. 1), and then described several cell types (Fig. 2) within this  
463 region. One of these small-field Lobula Plate Columnar cell types, LPC1, is required for  
464 regulating forward locomotion in response to backwards, translational visual motion (Fig. 3, 4).  
465 Further examination of LPC1 cells, along with another cell type, LLPC1 revealed that these  
466 neurons are specifically tuned to the optic flow a fly would experience while translating

467 backwards and forwards, and that this selectivity for translation over rotation is established via  
468 contralateral inhibition (Fig. 5, 6, 7). Taken together, these results establish the small-field output  
469 neurons of the lobula plate as a major conduit for translational optic flow. It is likely that they  
470 feed into circuits controlling locomotion, which can now be systematically explored using recent  
471 connectome data including the central brain<sup>36,63</sup>.

472

### 473 **Regulating forward locomotion using translational optic flow**

474

475 We established the Fly Vision Box as a high-throughput assay suitable for measuring locomotion  
476 of flies in response to visual stimuli. In retrospect we realized that the primary experience of flies  
477 in this assay is of translational optic flow. This feature has proven to be fortuitous, since the  
478 pathways and neurons that encode translational visual motion—likely the dominant visual  
479 experience of seeing animals moving through the world—is not well known. While previous  
480 work in blowflies had identified LPTs with translation-like properties<sup>34</sup> and mixed sensitivity for  
481 both translational and rotations motion in HS and VS cells<sup>62</sup>, our work presents the clearest  
482 demonstration of visual neurons specialized for detecting translational visual motion. Moreover,  
483 we found two cell types, LPC1 and LLPC1 that are selectively tuned for translational body  
484 motion in either the forward or backward direction, and thus likely critical for the visual  
485 regulation of forward locomotion. Based on the population-level activity measurements we made  
486 of LPC1 neurons, they are not sensitive to the fine structure of translational motion, as evidenced  
487 by the similar responses to more geometrically accurate representations of this motion (Fig.  
488 S5D).

489

490 Finding a translation-sensitive system built from populations of LPC1s and LLPC1s, small  
491 ipsilateral neurons, is an unexpected result. Due to their small size, these cell types had been  
492 underexamined in electrophysiological studies of larger flies, and by virtue of their small field of  
493 view, they cannot individually encode a translational flow-field. Pioneering work on optic flow<sup>3</sup>  
494 showed that accurate estimates of self-motion require large coverage of the visual field. This  
495 theoretical insight, as well as our results (Figs. 5,6,7), clarifies that the selectivity for translation  
496 over rotation is established by integrating motion signals across the two eyes. But what benefit  
497 do small neurons have for detecting translational body movements, a pattern with a global



498 consequence? One suggestion from our data (Fig. 5D, 6D) is that these cells might be used to  
499 estimate the travelling direction of the animal in conditions where the direction of gaze is not  
500 aligned to the heading direction, resulting in non-frontal foci of expansion/contraction<sup>31,57,64</sup>.  
501 Continuing down this speculative path, the suggestion is that smaller neurons provide flexibility  
502 for encoding different patterns of optic flow, and perhaps for encoding the potentially large  
503 dynamic range of local motion speeds found within translational flow fields. The geometry of  
504 optic flow is such that nearby objects will induce much larger local motion during translation  
505 (but not rotational) motion<sup>3</sup>, and so it is possible that a population of small neurons is better able  
506 to represent the structure of translational optic flow fields, since individual neurons can more  
507 faithfully encode the range of motion strengths without saturating. A future simulation study  
508 should carefully explore the trade-offs implied by this speculative proposal.

509  
510 It is noteworthy that while LPC1 silencing led to profound effects on forward walking, LLPC1  
511 silencing did not produce a similar forward walking deficit in response to translational motion.  
512 This finding may suggest that the control of visual motion induced by forward walking, expected  
513 to be a critical component of many behavioral programs, is likely more complex. It is possible  
514 that LLPC1 neurons, whose responses are well-matched to the idealized visual stimuli  
515 accompanying forward locomotion, may not directly contribute to the control of walking.  
516 Similarly, the repertoire of neurons encoding this visual motion and contributing to the  
517 behavioral control might be larger than in the LPC1 circuit, and thus more resilient to silencing.

518  
519 The simpler, causal role of LPC1 in regulating walking speed uncovered an unexpected result  
520 about locomotion control. We found that forward and turning components of walking behavior  
521 can be largely decoupled. When flies execute a rapid turn, they typically reduce their forward  
522 locomotion<sup>5</sup> (and Figure 4B), but as we show, silencing LPC1 and presenting visual stimuli,  
523 especially the FoE stimulus in Fig. 4C, exposed a clear deficit in the slowing down in forward  
524 walking without effecting turning. This stimulus further revealed a stunning concordance  
525 between behavioral effects of silencing and the neurons' visual sensitivity (Fig. 5D), suggesting  
526 that we have identified the critical transformation for this sensorimotor behavior—linking  
527 translational visual motion to the control of forward walking.

528

## 529 **Cascaded Inhibition as a prominent feature of the motion pathway**

530 While the mechanism by which contralateral visual motion signals suppress rotational motion  
531 responses in LPC1 (and LLPC1) neurons remains to be established, the discovery of the LPC-IN  
532 underscores the critical role of inhibition by neurons tuned to opposing directions of motion in  
533 sharpening directional selectivity. This computation, termed motion opponency<sup>51</sup>, now appears  
534 to be a general feature of motion detection at all scales for which motion is processed in the fly  
535 brain (Fig. 7C). The integration of offset excitatory and inhibitory contributions to the T4 and T5  
536 neurons is perhaps the first instance of opponency that is required for computing directional  
537 selectivity. These offset small-field inhibitory inputs correspond to 1-2 ommatidia, or <1% of the  
538 field of view of each eye<sup>10</sup>. In the lobula plate, the neurons integrating from the directionally  
539 selective neurons, such as the VS cells<sup>61</sup> or the LPLC2 looming sensitive neurons<sup>51</sup>, receive  
540 inhibitory contributions from interneurons of the Lobula Plate (LPi cells), which themselves  
541 receive inputs from T4/T5 and produce a sign inverted opponent motion signals<sup>18</sup>. Different bi-  
542 layer LPi cell types cover the lobula plate with different scales, from ~10% to nearly the entire  
543 field of view of each eye. Here we report a third instance of motion opponency, whereby the  
544 aggregate responses of the complete ipsilateral population of LLPC1 neurons appears to inhibit  
545 the complete population of LPC1 neurons through a single GABAergic interneuron in the central  
546 brain. This large-field inhibition occurs at the scale of the complete field of view of each eye  
547 (Fig. 7F). And finally, our consistent observation of contralateral motion influencing the  
548 encoding of ipsilateral motion signals in both LPC1 and LLPC1 demonstrates yet another  
549 inhibitory pathway, that combines visual information across the field of view of both eyes. The  
550 sharp selectivity of LPC1 and LLPC1 to translational stimuli therefore emerges from a cascaded  
551 arrangement of inhibition by non-preferred motion signals at increasing scales of vision.

552

## 553 **ACKNOWLEDGMENTS**

554 The screen of Generation 1 GAL4 lines was carried out as part of the Fly Olympiad Project  
555 Team at Janelia with the assistance of James McMahon, Amanda Cavallaro, and others in  
556 Janelia's Fly Core team, and also Nan Chen, Darlene Evich, Yukiko Ho, Mary Phillips, and  
557 Sharon Low. The GAL4 line screen benefitted from the guidance of the steering committee  
558 (including Julie Simpson and Gwyneth Card), early access to the FlyLight Project Team's data,  
559 and Arnim Jenett and Yoshi Aso's selection of GAL4 driver lines. We thank the Janelia FlyLight

560 Project Team for help imaging driver lines. The Fly Vision Box was developed and supported  
561 with contributions from Steve Sawtelle, Sam Watkins, Magnus Karlsson, and software pipeline  
562 and analysis contributions from Allen Lee, Lowell Umayam, Frank Midgley, Don Olbris, Rob  
563 Svirskas, and Will Dickson. We thank Lihi Zelnik-Manor, Tim Lebetzky, Pietro Perona, and  
564 David Anderson, for permission to use and update fly tracking code that the Fly Vision Box  
565 video analysis is based on. We thank Emily Nielson for the schematic of the Fly Vision Box  
566 apparatus (Fig. 1A) and summary data visualizations. We are also grateful to members of the  
567 Reiser Lab, especially Kit Longden for support during this project and comments on the  
568 manuscript. This work is funded by the Howard Hughes Medical Institute through its support of  
569 the Janelia Research Campus. This article is subject to HHMI's Open Access to Publications  
570 policy. HHMI lab heads have previously granted a nonexclusive CC BY 4.0 license to the public  
571 and a sublicensable license to HHMI in their research articles. Pursuant to those licenses, the  
572 author-accepted manuscript of this article can be made freely available under a CC BY 4.0  
573 license immediately upon publication.

574

## 575 **AUTHOR CONTRIBUTIONS**

576 Conceptualization, M.D.I., A.N., G.M.R., K.B., and M.B.R.  
577 Methodology, M.D.I., A.N., G.K.L., T.T., A.W.E., W.K., K.B., and M.B.R.  
578 Software: M.D.I., G.K.L., W.J.R., K.B., and M.B.R.  
579 Validation: W.J.R., A.W.E., and W.K.  
580 Formal Analysis: M.D.I., J.L.M.E., K.B., and M.B.R.  
581 Investigation: M.D.I., J.L.M.E., A.N., W.J.R., and A.W.E.  
582 Resources: A.N., E.M.R., and W.K.  
583 Data Curation: W.J.R. and A.W.E.  
584 Writing – Original Draft: M.D.I., A.N., and M.B.R.  
585 Writing – Review & Editing: M.D.I., A.N., E.M.R., and M.B.R.  
586 Supervision: W.K., G.M.R., and M.B.R.  
587 Funding Acquisition: G.M.R., K.B., and M.B.R.

588

## 589 **Declaration of Interests**

590 The authors declare no competing interests.

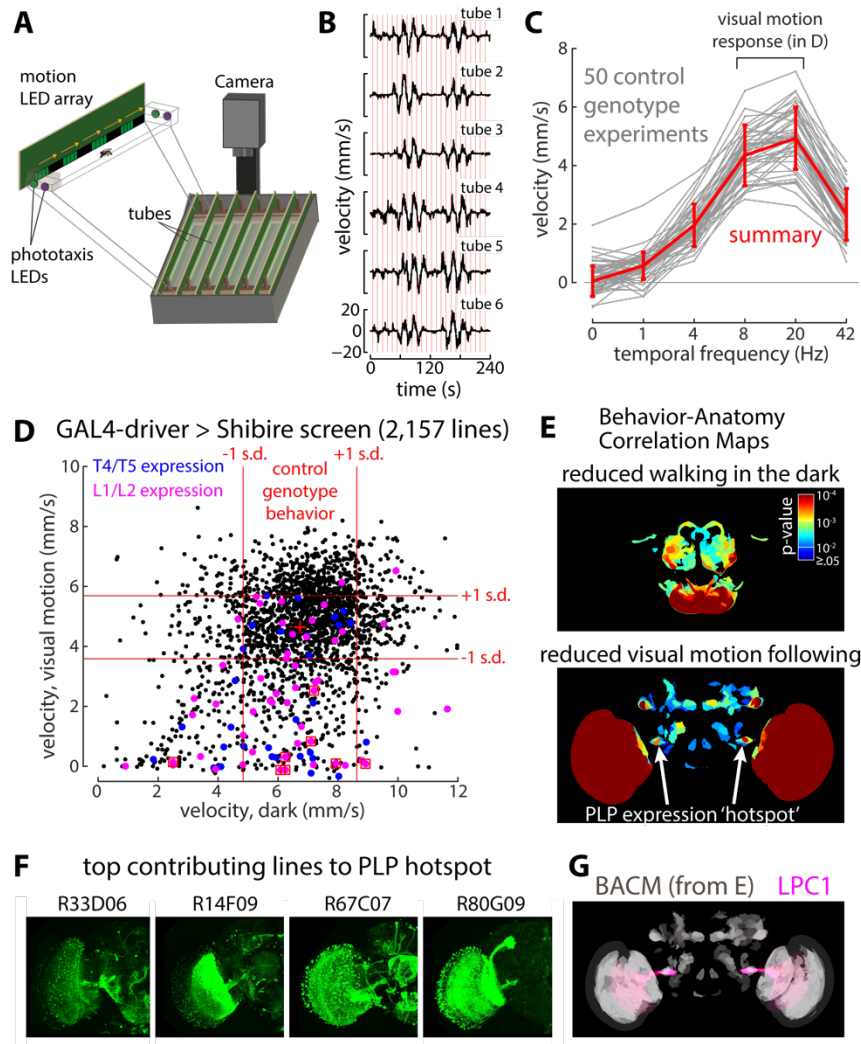

591

592 **Fig. 1. Localizing the neuroanatomical correlates of visuomotor behavior**

593 (A) Left: Schematic of the Fly Vision Box assay. 10-15 flies are placed in each of 6 small clear  
 594 plastic corridors and presented with motion stimuli by LEDs lining one of the walls of each  
 595 corridor. The direction of scrolling motion causes a directional walking response, measured by  
 596 infrared cameras mounted above and off-line fly movement tracking and analysis. (B)  
 597 Representative experiment of walking flies, of the control genotype ('empty' GAL4 line crossed  
 598 to *UAS-Shibire<sup>ts1</sup>*) used as a reference for the GAL4 line screen, in the Fly Vision Box. The  
 599 timeseries of walking responses to drifting gratings presented at multiple speeds (start of each  
 600 trial indicated by vertical red lines), plotted as the mean velocity of all flies in each tube (details

601 of these ~4-minute protocols in the Methods). These timeseries are summarized as tuning curves  
602 across the temporal frequency of the grating motion in each trial, in (C), which shows the  
603 aggregate responses of control flies run in 50 independent experiments, selected at random, to  
604 demonstrate the consistency of these behavioral reactions. The  $N = 729$  control experiments are  
605 further summarized (in red) as the mean  $\pm$  s.d., which is used as a basis for comparing the effects  
606 of silencing neurons in the various GAL4 lines (see also Fig. S1A). 2157 ‘generation 1’ GAL4  
607 lines (4144 experiments, nearly all genotypes run twice) driving expression of *UAS-Shibire<sup>ts1</sup>*  
608 were screened through the Fly Vision Box. The results of this screen are summarized (D), where  
609 each point is the mean of the behavioral metric across all tubes and all experiments for one  
610 genotype. This scatter plot shows the velocity of flies following the visual motion of the drifting  
611 grating (mean response to 8 and 20 Hz conditions, as indicated in C) against the mean walking  
612 velocity in the dark before any visual motion was presented (to capture general deficits in  
613 locomotion). Red lines mark  $\pm 1$  s.d. from the mean of these metrics for the control genotype  
614 (mean indicated by red cross). Lines with confirmed expression in the Lamina Monopolar Cells  
615 L1 or L2 are indicated in magenta (red boxes indicate expression in both) and lines with T4/T5  
616 expression are indicated in blue. (E) The brain regions of GAL4-driver expression that are  
617 correlated with specific behavioral differences, relative to control flies, represented as maximum  
618 intensity projections of Behavior Anatomy Correlation Maps (BACMs)<sup>46</sup>. BACMs for reduced  
619 walking in the dark (top) and following of fast visual motion (bottom) show very different units  
620 of driver-line expression. The BACMs are color coded by p-values (on a log plot, see Methods).  
621 Arrows point to the anatomical region that will be the focus of much of this manuscript, a  
622 ‘hotspot’ of expression in the Posterior Lateral Protocerebrum (PLP). Related BACMs are shown  
623 in Fig. S1D-F. (F) Representative images of expression patterns (where the indicated GAL4 line  
624 drives *UAS-GFP*, shows as maximum intensity projections) for four lines that strongly contribute  
625 to the hotspot identified in (E). (G) The hotspot, seen in the BACM from (E), shown in gray,  
626 strongly overlaps with a cell type called the Lobula Plate Columnar type 1 cell, represented here  
627 by the expression pattern of a split-GAL4 line (shown in magenta, detailed in Table 1) developed  
628 for this study. The genotypes used in the GAL4 line screen are in Table S1.

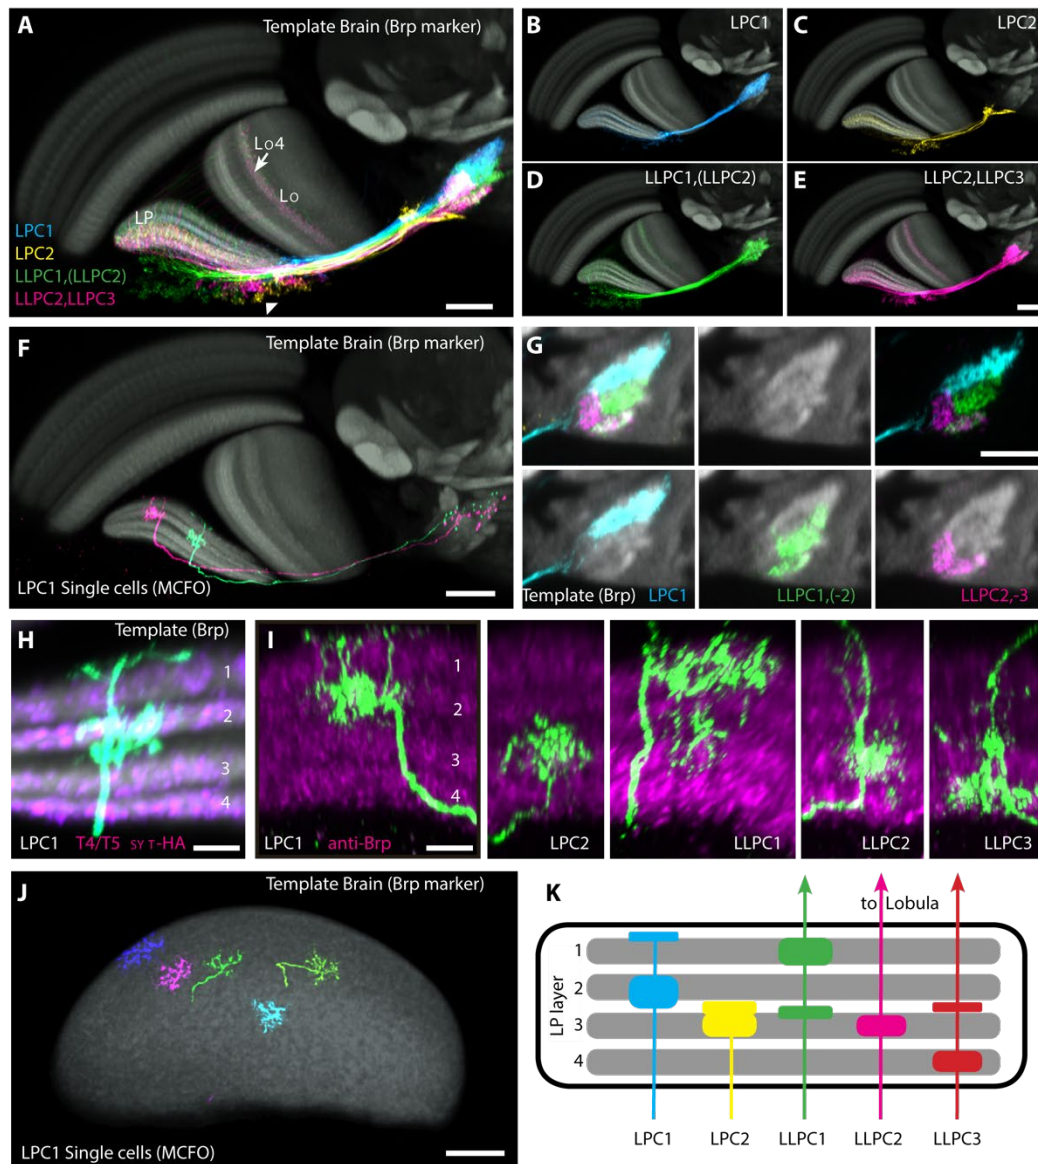

629

630

631 **Fig. 2. Small-field visual projections neurons of the lobula plate.**

632 (A-E) Projection patterns of Lobula Plate Columnar (LPC) and Lobula Lobula Plate Columnar  
 633 (LLPC) neurons. LPC (A,B,C) and LLPC (A,D,E) neurons have cell bodies in the lobula plate  
 634 cell body rind, layer-specific arborizations in the lobula plate and project to the LPC glomerulus,  
 635 a distinct, synapse-rich neuropile subregion in the posterior lateral protocerebrum (PLP). The  
 636 LPC glomerulus is located posterior and ventral to most other optic glomeruli. LLPC cells also  
 637 send a process to lobula layer Lo4. Images are composites of registered brains expressing a

638 membrane marker in the indicated cell types and the neuropile marker of the template brain used  
639 for alignment. Anterior is up and medial to the left. Additional details of individual Figure  
640 panels, such as fly genotypes, can be found in Table 1. (F) Two individual LPC1 cells were  
641 labelled using MCFO<sup>65</sup> and displayed as in (A-E). Single cells of the other cell types are shown  
642 in Fig. S2A-D. (G) Projections patterns of LPC and LLPC cell types reveal subdivisions of the  
643 LPC glomerulus. Single slices of composite image stacks of registered brains with a presynaptic  
644 marker (synaptotagmin-HA) expressed in the indicated cell types. Neuropile marker of the  
645 template brain in grey. (H) Sublayer structure of the lobula plate. Four synapse rich sublayers  
646 that contain presynaptic sites of directionally-selective T4/T5 neurons are separated by sublayers  
647 with lower synapse density. LPC1 processes in LP layer 2 overlap with the presynaptic sites of  
648 T4/T5 neurons in this layer. Images are composites of registered brains as above. The LPC1 cell  
649 (green) is one of the two neurons shown in (F). T4/T5 presynaptic sites were labeled by  
650 expression of synaptotagmin-HA in these cells. The Brp-based neuropile label of the template  
651 brain (in grey) provides an indication of overall synapse density. (I) Lobula plate layer patterns  
652 of LPC and LLPC cell types. LP layers were identified by anti-Brp labeling (magenta) and the  
653 relative position of the four main layers. (J) Spread of individual LPC1 cells in the lobula plate.  
654 Composite of MCFO labeled LPC1 cells from different registered image stack together with  
655 neuropile marker of the template brain are shown. Only signal within or very close to the lobula  
656 plate was included in the projections in the images. For some cells (here the two green neurons),  
657 this includes parts of neurites extending along the surface of the lobula plate. (K) Schematic  
658 illustrating the distinct optic lobe layer patterns of the five LPC and LLPC lobula plate VPNs  
659 distinguished in this study. For each cell type, the main overlap with T4/T5 terminals is in a  
660 single lobula plate layer (corroborated by EM connectome<sup>18</sup>). All cell types, especially LPC1,  
661 LLPC1 and LLPC3, also have branches in other lobula plate sublayers. LLPC cells also project  
662 to lobula layer Lo4. Scale bar in A, E, F, G, J is 20  $\mu\text{m}$  and 5  $\mu\text{m}$  in H, I.

663

**A** split-GAL4 line (cell type expressed)

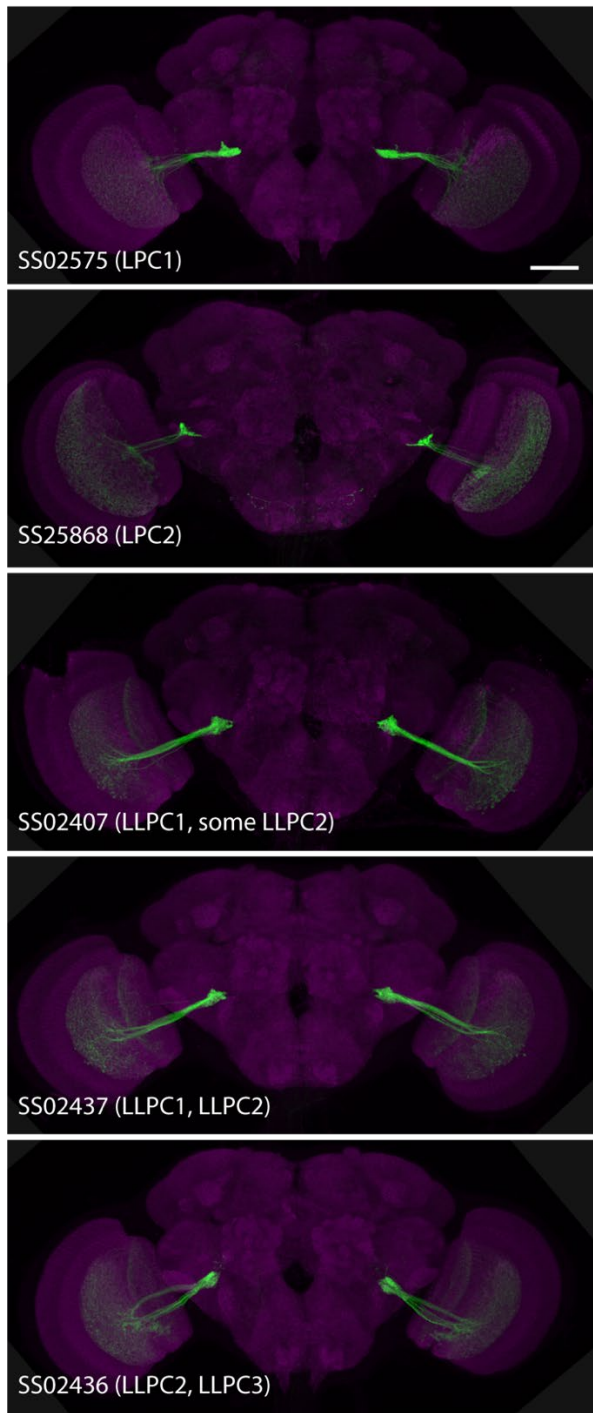

**B**

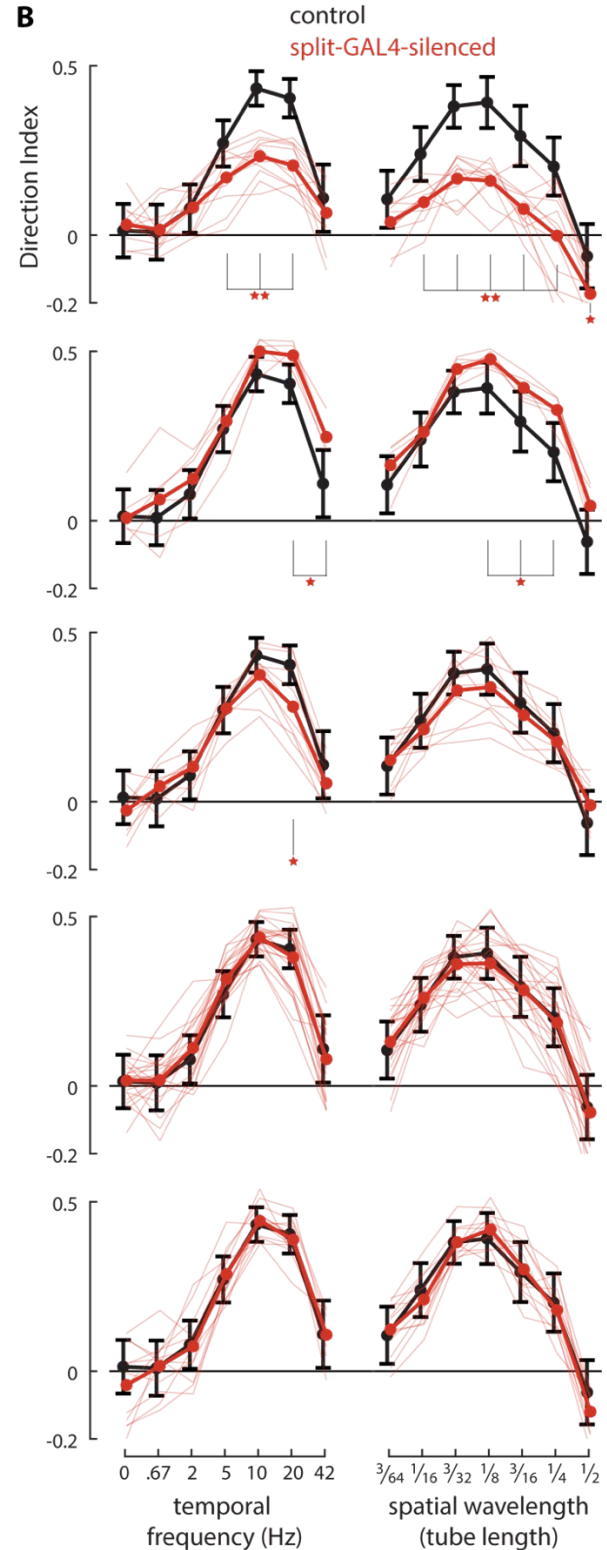

664

665 **Fig. 3. LPC1 neurons contribute to following visual motion**

666 Split-GAL4 lines were developed to target expression to the small-field Lobula Plate Projection  
667 neurons. The expression pattern images (A) are maximum intensity projections through the full



668 depth of fly brains. Each indicated split-GAL4 driver was used to express a membrane marker,  
669 shown in green, while a neuropile marker (anti-Brp) is shown in magenta. Scale bar, 50  $\mu\text{m}$ . The  
670 effect of silencing the neurons (by expressing *shibire<sup>ts1</sup>*) on visual motion following in the Fly  
671 Vision Box is shown in (B), alongside the corresponding expression patterns in A. Visual motion  
672 responses from an extended protocol in the Fly Vision Box to gratings moving at a range of  
673 temporal frequencies and spatial wavelength (of the grating cycle, all moving with a temporal  
674 frequency of  $\sim 10$  Hz), summarized as tuning curves, quantified with a Direction Index (see  
675 Methods). The behavior of each split-GAL4 line  $>$  UAS-*Shibire<sup>ts1</sup>* is plotted in red, with  
676 individual tube data shows in lighter lines (6-24 tubes per genotype), and the mean across tubes  
677 shown in thicker lines, and is compared to the split-GAL4 control genotype (in black, mean  $\pm$   
678 s.d. of 208 tubes of flies from 36 experiments. Silencing LPC1 neurons leads to large, significant  
679 reductions in following visual motion, a result further confirmed by ‘doubly silencing’ these cells  
680 using several LPC1-expressing split-GAL4 lines (Fig. S1). Statistical significance between  
681 experimental and control genotypes determined using Mann-Whitney U-test controlled for False  
682 Discovery Rate: 1 star =  $p < 0.05$ ; 2 stars =  $p < 0.01$ . Additional images of the split-GAL4 lines  
683 are in Fig. S3B,C. The genotypes contributing to this Figure are in Table 1.  
684

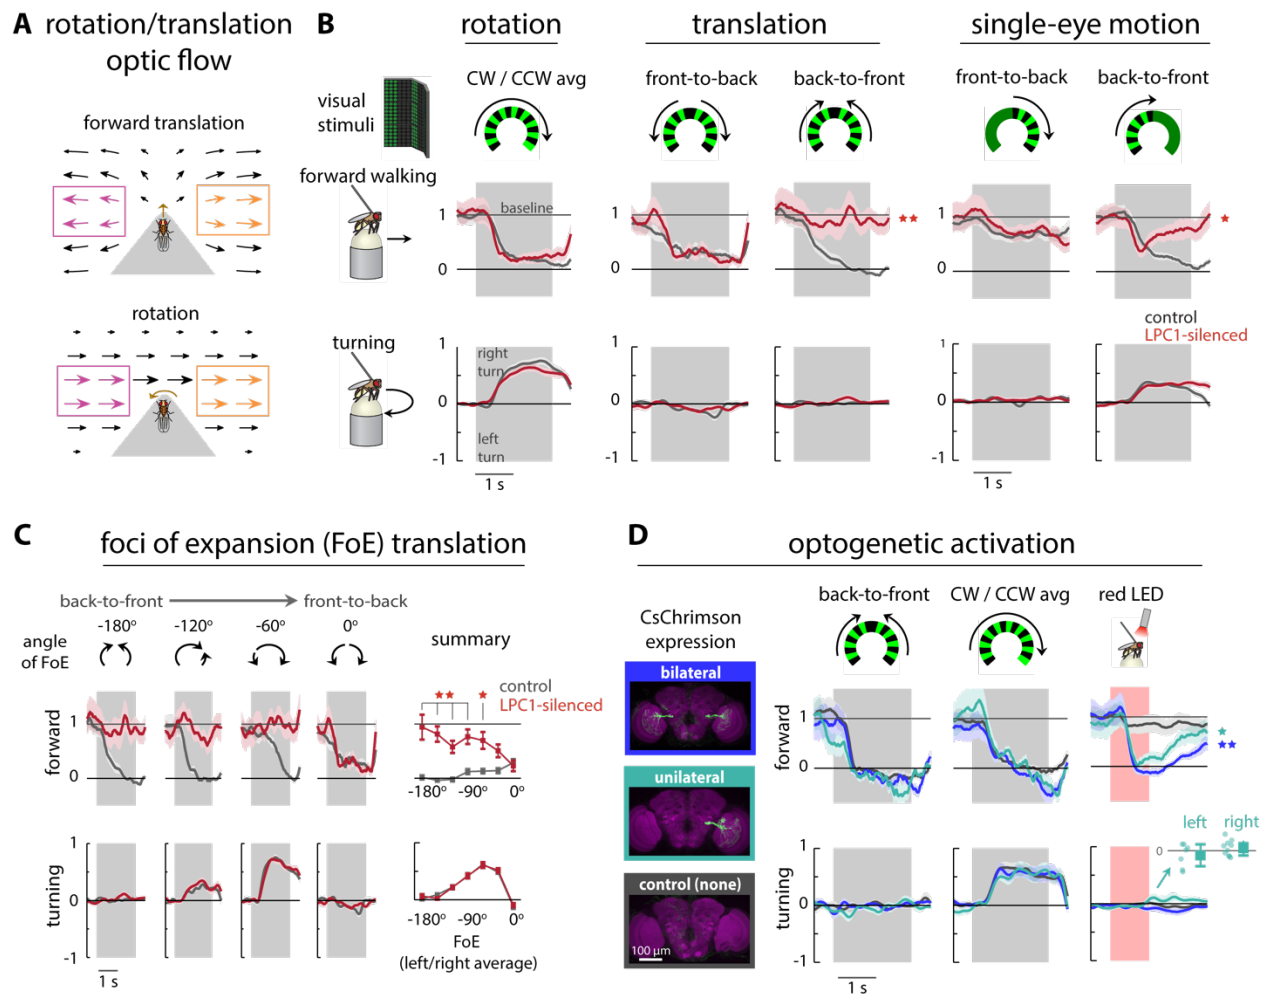

685

686 **Fig. 4. LPC1 neurons play a critical role in the behavioral response to back-to-front**  
 687 **translational motion**

688 (A) Illustration of optic flow experienced by a fly moving forward (translation) or turning to the  
 689 left (rotation). Arrows plotted in Mercator projection (cosine corrected) with size of arrows  
 690 proportional to the apparent angular speed. (B) Forward walking and turning responses of  
 691 tethered flies walking on an air-supported ball to moving visual grating patterns. Flies were  
 692 positioned in the center of the cylindrical LED display. The visual stimuli present either  
 693 rotational or translational visual motion, or motion restricted to one eye, and are schematized  
 694 using a top-down view of the arena. Mean time courses of the forward and turning components  
 695 of the walking responses are plotted as mean  $\pm$  SEM (shaded) for  $n = 20$  LPC1-silenced flies in  
 696 red and  $n=20$  genetic control flies in black. Grating patterns ( $30^\circ$  spatial wavelength) moved with  
 697 9 Hz temporal frequency corresponding to  $270^\circ/s$  (responses to additional speeds in Fig. S4).

698 Grey box indicates when moving gratings are presented, otherwise the flies are presented a  
699 uniform (blank) pattern of intermediate brightness. (C) Left: Mean time course of turning and  
700 forward components of the tethered walking responses to translational visual motion presented  
701 with different foci of expansion. The data are plotted as in B. Right: The summarized forward  
702 walking and turning responses to the complete set of experimental conditions with translational  
703 motion emanating from foci of expansion located every 30° around the fly. (D) Left: Examples  
704 of fly brains where CsChrimson was stochastically targeted to LPC1 neurons (using established  
705 method<sup>47</sup>). Flies were dissected and imaged after behavioral experiments, so flies could be  
706 grouped based on expression: n=19 flies with bilateral LPC1 expression, dark blue; n=17 flies  
707 with unilateral expression, in teal; n=14 flies lacking expression that serve as the negative  
708 control, in black; example maximum-intensity projections of confocal stacks shown on the left.  
709 Right: Mean time course of forward and turning components of walking responses to back-to-  
710 front translational motion, rotational motion, and optogenetic activation with a fiber-coupled red  
711 LED. Bottom-right inset: Mean turning response of flies with unilateral CsChrimson expression  
712 separated into left or right hemisphere expression (n=7 left, n=10 right). Statistical significance  
713 between experimental and control flies determined using Mann-Whitney U-test controlled for  
714 False Discovery Rate: 1 star =  $p < 0.05$ ; 2 stars =  $p < 0.01$ . Turning responses are presented for  
715 one direction but are averaged across L/R symmetric conditions (see Methods). The genotypes  
716 contributing to this Figure are in Table 1.

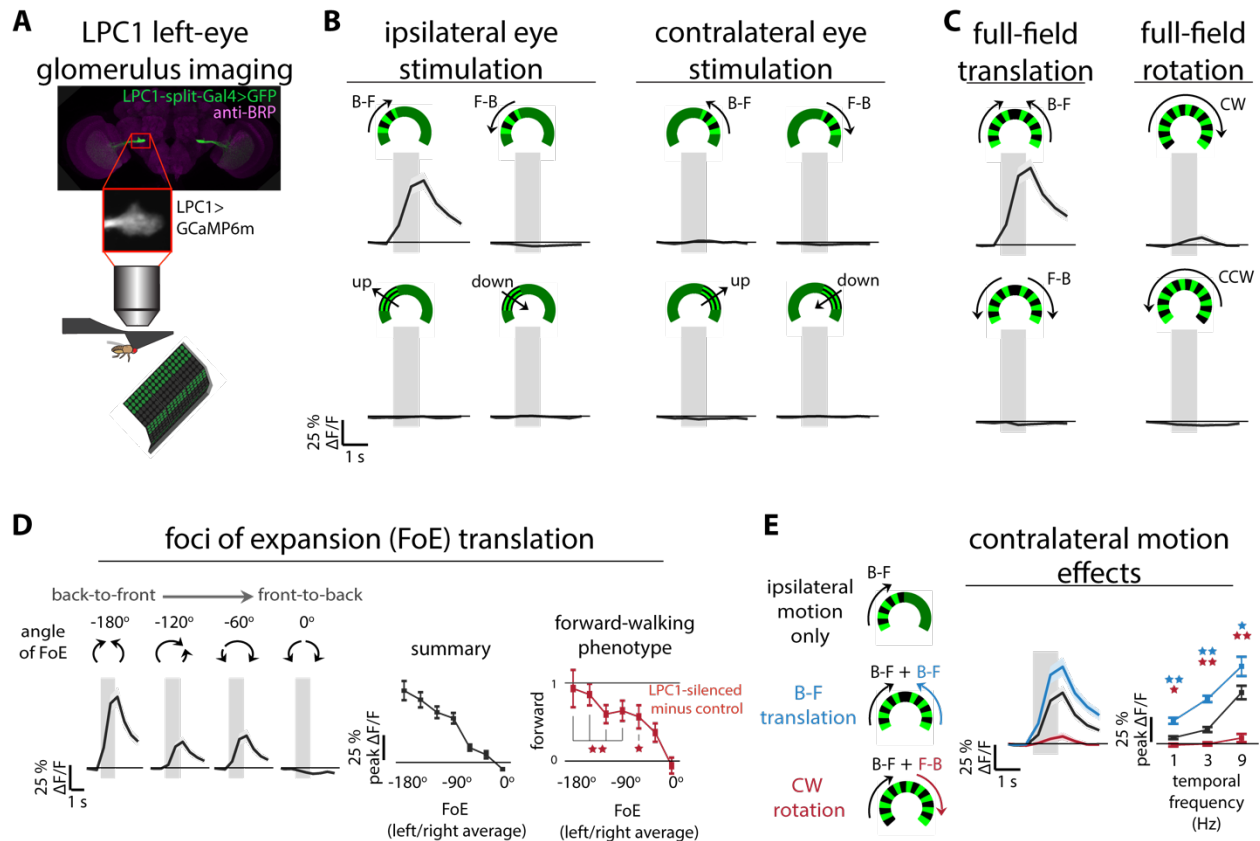

717

718 **Fig. 5. LPC1 neurons selectively encode back-to-front translational visual motion by**

719 **integrating contralateral motion**

720 (A) Schematic representation of *in vivo* two-photon calcium imaging setup. The activity of the

721 population of LPC1 neurons on the left side, expressing GCaMP6m, is imaged from the

722 glomerulus, while the fly views visual stimuli. (B-E) The time course of the left LPC1

723 glomerulus calcium response to visual grating motion (30° spatial wavelength, moving at 9 Hz

724 temporal frequency, presentation interval indicated with the gray bar). Stimuli are schematized

725 showing the top-down view of the display. Data displayed as mean  $\pm$  SEM (shaded region) for

726 n=10 flies. (B) LPC1 responses to grating stimuli moving in four directions, presented to the left

727 and right eyes independently. The stimulation window spanned 20-90° in azimuth measured

728 from the midline of the fly's visual field. (C) LPC1 responses to full-field rotational and

729 translational motion spanning -90° to 90° in azimuth. (D) Left: LPC1 responses to translational

730 motion presented with the Focus of Expansion (FoE) at different azimuthal positions. Right:

731 Summary of the peak ( $\pm$  SEM) LPC1 calcium responses to the translational stimuli emanating

732 from different foci of expansion, plotted alongside the LPC1 silencing behavioral phenotype

733 (data from Fig. 4C re-plotted as the difference in forward-walking between LPC1-silenced flies  
734 and control flies). (E) Mean ( $\pm$  SEM) time course of LPC1 calcium responses to ipsilateral back-  
735 to-front motion presented alone or paired with contralateral back-to-front and front-to-back  
736 motion. The responses across several stimulus speeds are shown summarized on the right and  
737 responses to related stimuli shown in Fig. S5C,D. Statistical significance between the bilateral  
738 and the ipsilateral responses is assessed using the Mann-Whitney U-test corrected for False  
739 Discovery Rate: 1 star =  $p < 0.05$ ; 2 stars =  $p < 0.01$ . All calcium imaging data in this figure come  
740 from the same set of  $n=10$  flies.

741

742

743

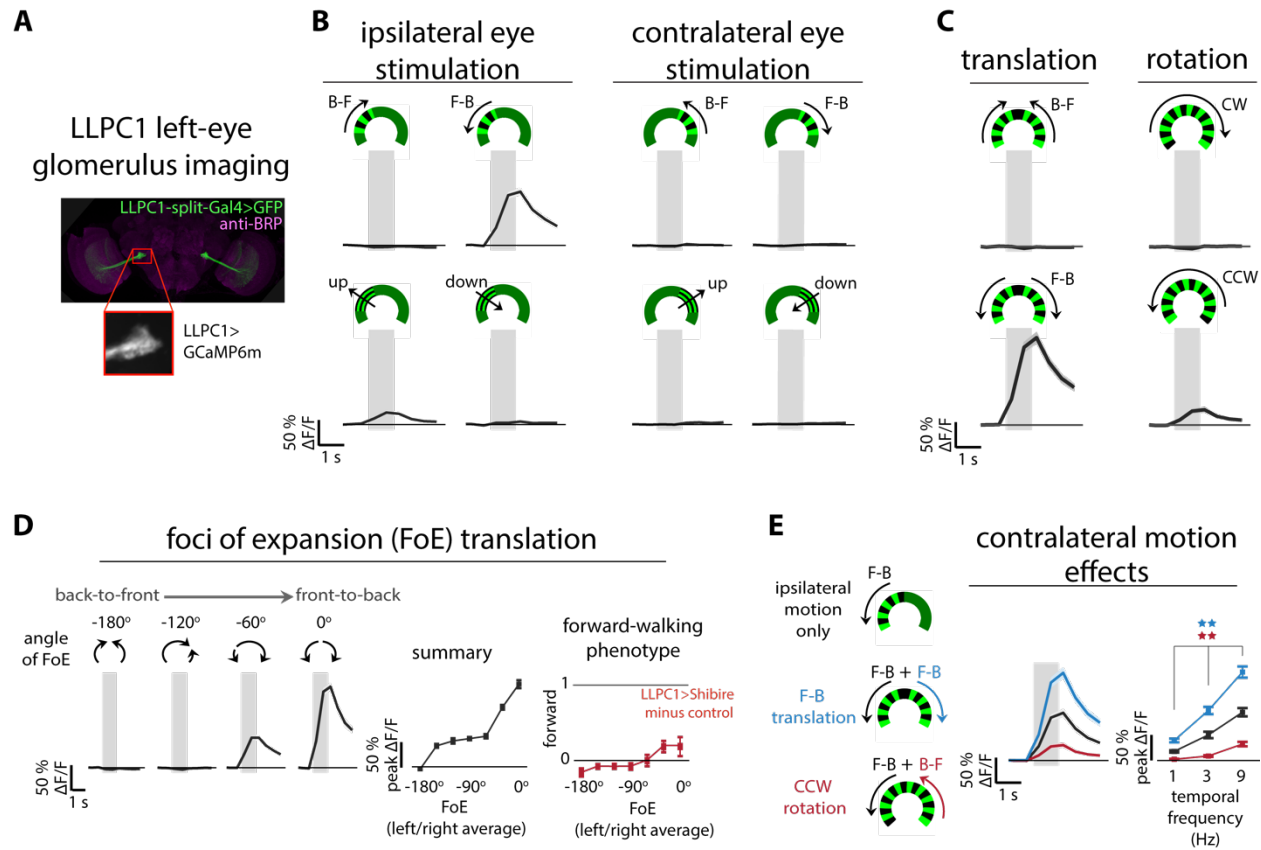

744

745 **Fig. 6. An additional small-field neuron type, LLPC1, encodes translational visual motion**  
 746 **with directional selectivity opposite to LPC1 neurons**

747 (A) The visual motion evoked calcium responses of the left side LLPC1 neurons, expressing  
 748 GCaMP6m, were obtained by imaging from the glomerulus, following the methods of Fig. 5.

749 (B-E) Time course of the left LLPC1 population calcium response to the identical visual motion  
 750 stimulus protocol used for the functional imaging of LPC1 neurons in Fig. 5. The calcium

751 imaging data are based on  $n=10$  flies and are plotted using the same format and conventions as  
 752 Fig. 5, where the most noteworthy difference is the direction of preferred motion—LLPC1

753 neurons responds primarily to front-to-back visual motion (but see Fig. S7A,B for further details  
 754 on the modest response to upwards motion). In (D) the responses to translational motion

755 emanating from different foci of expansion are compared to the behavioral results of silencing  
 756 LLPC1 neurons (behavioral data from Fig. S6B re-plotted as the difference in forward-walking

757 between LLPC1-silenced flies and control flies). (E) Contralateral front-to-back motion enhances  
 758 the ipsilateral response, while contralateral back-to-front motion suppresses it, consistent with

759 selective tuning for forward translational motion (responses excluding binocular overlap zone in

760 Fig. S7C). Statistical significance is assessed using the Mann-Whitney U-test corrected for False  
761 Discovery Rate: 1 star =  $p < 0.05$ ; 2 stars =  $p < 0.01$ .

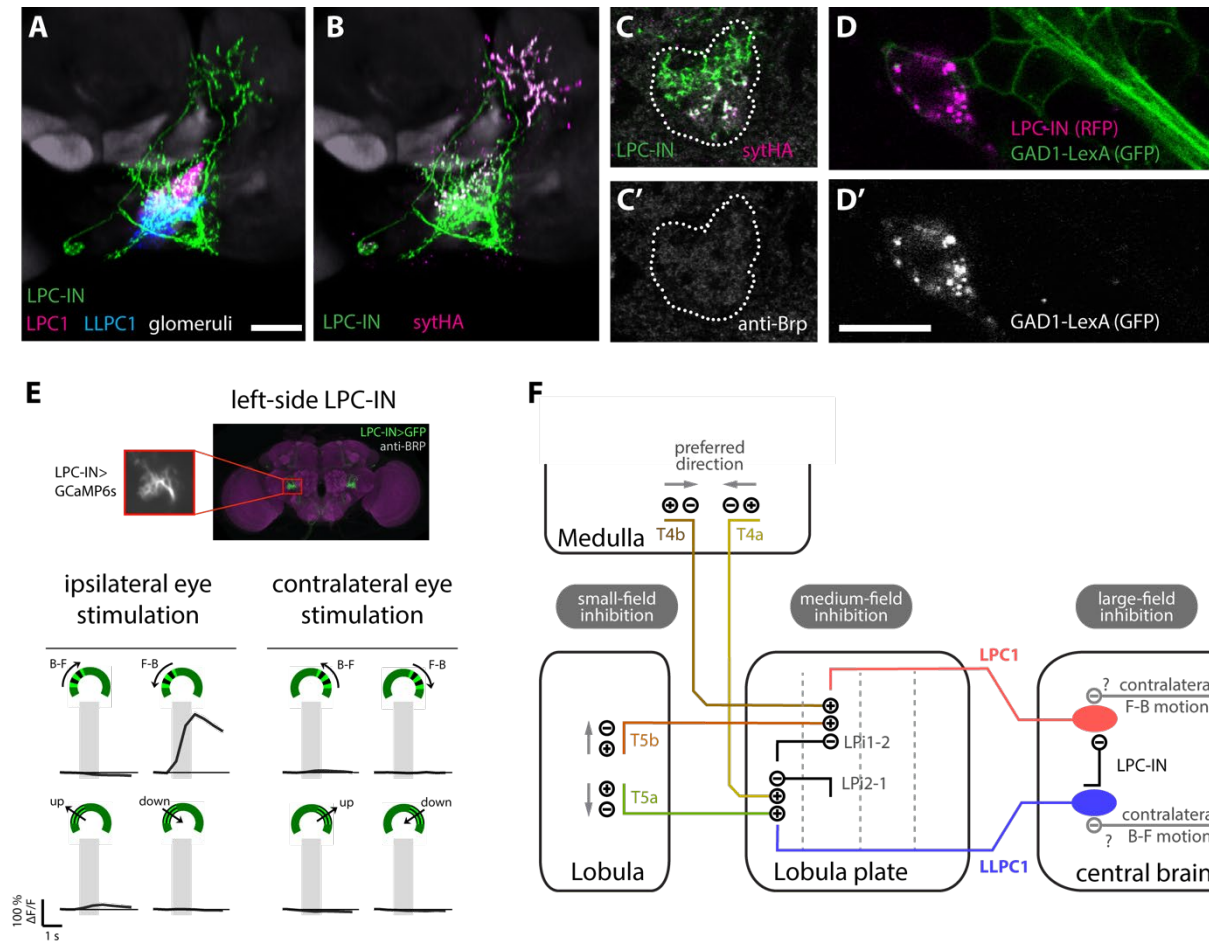

762

763 **Fig. 7. Cascaded inhibition from neurons tuned to opposite directional motion establishes**

764 **LPC1's selectivity for translational motion**

765 (A) Overlay of registered brains (same orientation as Fig. 2A-G) showing an interneuron, LPC-

766 IN (labeled with a membrane marker; green). The LPC1 and LLPC1 glomeruli are indicated in

767 cyan and magenta, respectively. Processes of LPC-IN are found throughout both the LPC1 and

768 LLPC1 target regions. The neuropile label of the reference brain is in grey. Scale bar, 10  $\mu$ m. (B)

769 Overlay as in (A) with a pre-synaptic marker (syt-HA) shown in magenta. (C,C') Distribution of

770 the syt-HA marker in a single section through the LPC glomerulus. Based on comparison with

771 registered samples (as in A,B) most LPC-IN presynaptic sites within the LPC glomerulus overlap

772 with LPC1, not LLPC1. (D,D') LPC-IN expresses GAD1. Double labeling showing LPC-IN

773 (magenta) and a GAD1-LexA reporter (green in D, grey in D'). FISH against GAD1, ChAT and

774 VGlut (see Fig. S8) also supports a GABAergic phenotype of LPC-IN. Scale bar, 10  $\mu$ m. (E) *In*

775 *in vivo* two-photon calcium imaging of the left side LPC-IN, using a split-GAL4 line expressing

776 GCaMP6s, in response to visual motion stimuli. The mean ( $\pm$  SEM) time course of the left LPC-



777 IN calcium responses to the identical stimulus protocol as in Fig. 5B, 6B, from n=4 flies. (F)  
778 Summary diagram of the direction-selective circuitry contributing to LPC1 and LLPC1  
779 selectivity for translational motion in both the optic lobe and central brain, emphasizing the  
780 importance of inhibition. Directional preferences are first established by the T4 and T5 neurons,  
781 where small-field, trailing-side inhibition plays a critical role<sup>10,15,66</sup>. In the lobula plate, the bi-  
782 layer LPi neurons sharpen the directional tuning inherited from T4/T5 neurons via motion  
783 opponency<sup>61</sup> acting on LPC1 and LLPC1<sup>18</sup>. In the central brain, the LPC-IN cell reinforces the  
784 directional sensitivity established in the optic lobe by inhibiting LPC1 neurons in responses to  
785 LLPC1 activation. The pathways for LPC1 and LLPC1 modulation by contralateral motion have  
786 not been identified but are hypothesized to be acting on the glomeruli.

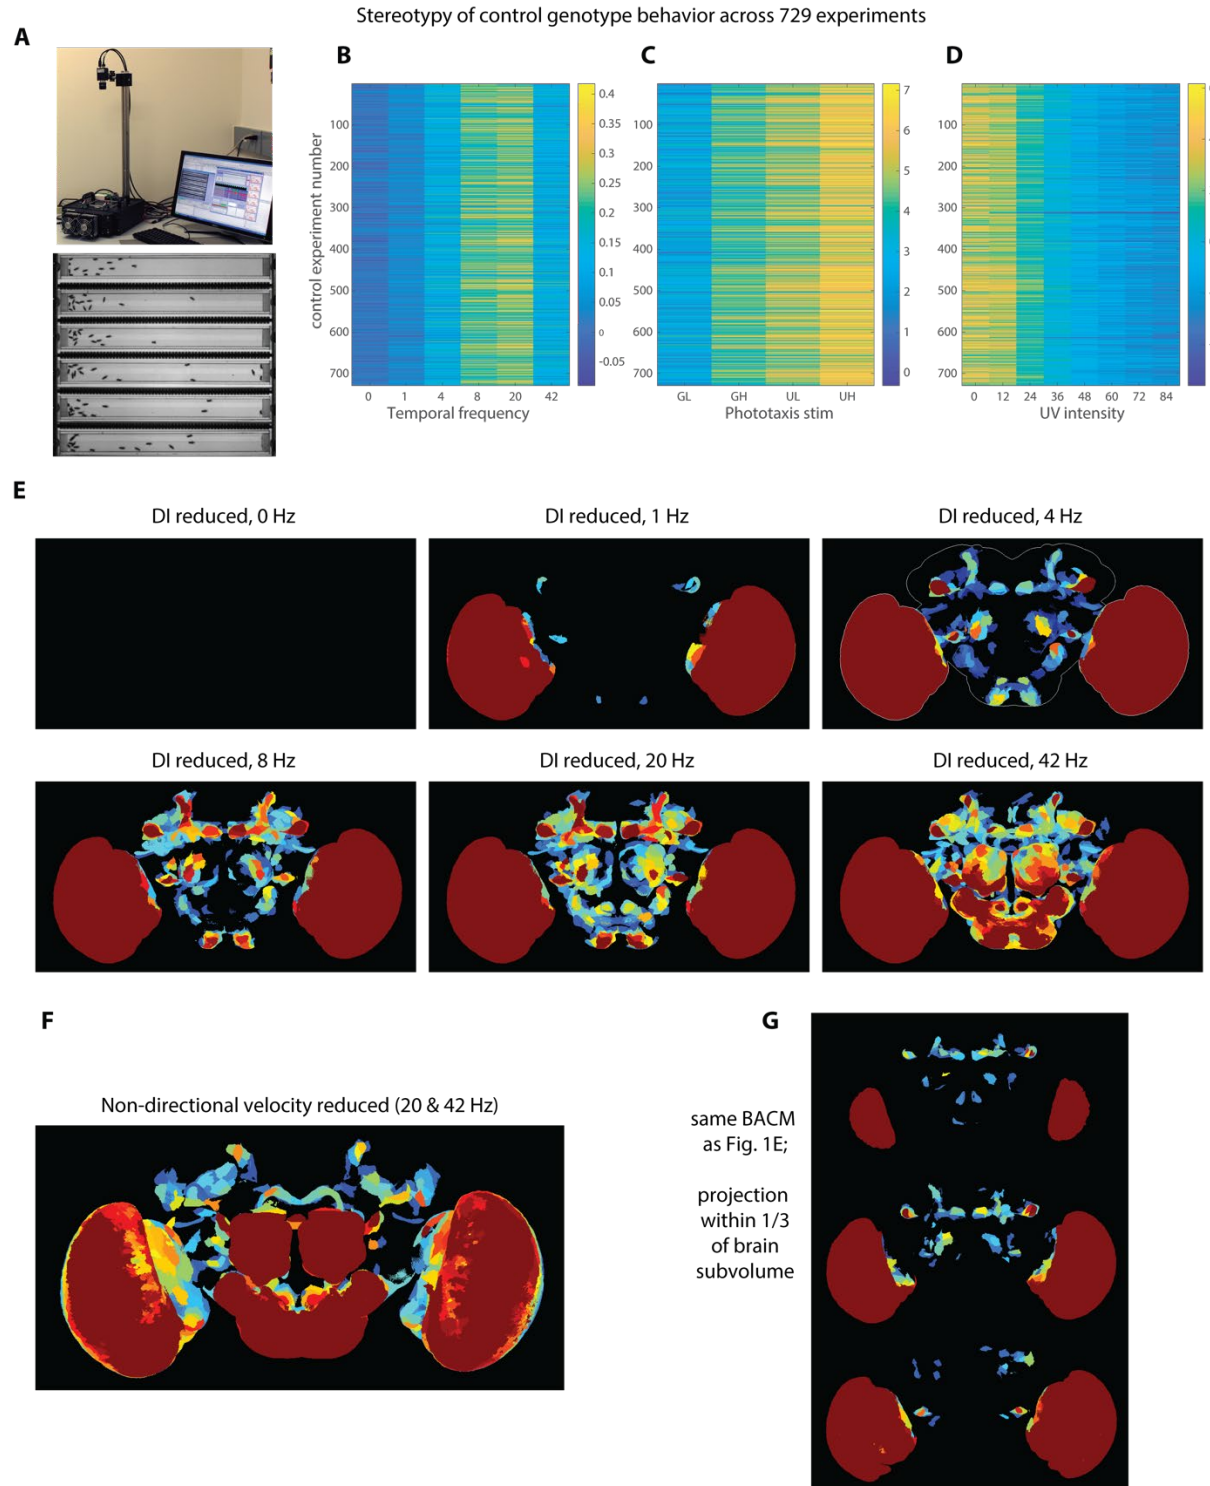

787

788 **Fig. S1, related to Fig. 1. Stereotypy of behavioral responses in the Fly Vision Box and**  
789 **additional Behavior Anatomy Correlation Maps.**

790 (A) A photograph of the Fly Vision Box in the lab, showing the software interface, above a

791 single frame view of a typical experiment. The tubes are 120 mm long and 10 mm wide. To

792 further demonstrate the replicability of the fly behaviors we measure during our screen, the mean  
793 behaviors of >700 experiments of control flies are shown using a color-map to represent the  
794 behavioral metrics for different experimental modules of our screening protocol (see methods).  
795 (B) Responses to visual motion (as in Fig. 1 B, C) represented as the Direction Index (DI). (C)  
796 The phototaxis responses while flies walked towards UV or green LED with the indicated  
797 intensity level (GL - Green Low, GH - Green High, UL - UV low, UH – UV high) at the end of  
798 the tubes. The behavior is quantified as the Direction Index integrated over each trial (see  
799 methods). (D) The behavior of flies during a spectral preference task, similar to phototaxis, but  
800 where at one end a UV LED was illuminated with the indicated (relative) intensity, while the  
801 other end was illuminated with a green LED at a fixed intensity. The data are again represented  
802 as integrated Direction Indices. For the lower UV levels, flies walked towards the green LED,  
803 but walk towards the UV LED at higher UV levels. Behavior Anatomy Correlation Maps<sup>46</sup> can  
804 be computed for any behavioral metric. In (E) the BACM for a reduction in the visual motion  
805 following behavior, computed as a Direction Index, for each temporal frequency, corresponding  
806 to each point along the tuning curve of Fig. 1C, Fig. S1B, is shown. The protocol contains a trial  
807 in which the grating pattern is shown but does not move. Flies could not generate a directional  
808 response to a non-moving pattern, and so the empty BACM corresponding to this ‘0 Hz’  
809 condition serves as a sanity check for the analysis method. All BACMs for reduced directional  
810 following in the conditions with visual motion show correlations with expression in the optic  
811 lobes, while increasing speeds appear to be affected by contributions from broader expression  
812 throughout the central brain. The conditions of 4Hz, 8 Hz, 20 Hz, and 42 Hz all show expression  
813 in the PLP glomerulus, which became the focus of this study. The BACM in (F) corresponds to  
814 behavioral responses to visual motion that do not account for the direction of walking, as the DI  
815 metrics do. We note this BACM shows some similar, but also notably different units of  
816 expression the those in E. (G) shows the same BACM, for visual motion following as in Fig. 1E-  
817 lower, but shown here as 3 maximum intensity projections in each subvolume, roughly 1/3 the  
818 depth, of the fly brain. The color map in all BACMs is the same as in Fig. 1, logarithmically  
819 encoding the range of p-values from 0.05 to 0.0001.

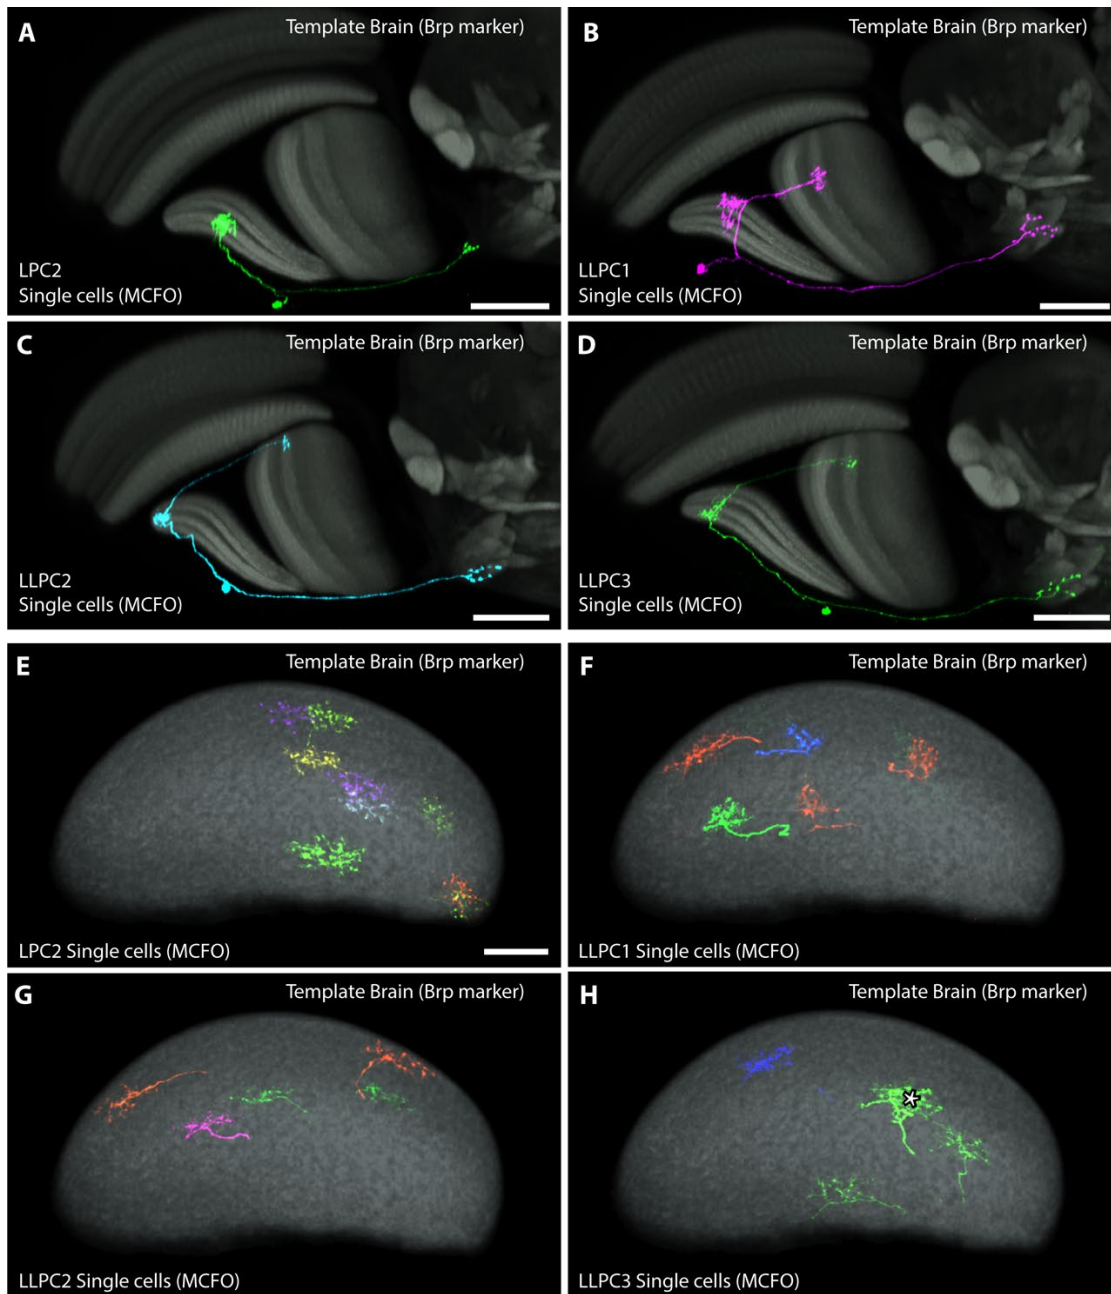

820

821 **Fig. S2, related to Fig. 2. Single cell anatomy of the small-field Lobula Plate projection**  
822 **neurons.**

823 (A-D) Single cell anatomy of LPC2 (A), LLPC1(B), LLPC2(C) and LLPC3(D) cells. MCFO-  
824 labeled neurons of the indicated cell types displayed as in Fig. 2F. The field of view and  
825 projected volume are slightly different for each cell type to accommodate difference in the  
826 position of the labelled cells within the lobula plate. Scale bar, 30  $\mu\text{m}$ . (E-H) En face views of  
827 the lobula plate with individual LPC2 (E), LLPC1(F), LLPC2(G) and LLPC3(H) cells. Asterisk

828 in (H) marks two overlapping arbors from different cells. Images are composites of MCFO  
829 labeled single cells from multiple optic lobes displayed as in Fig. 2J. Scale bar in A-D is 30  $\mu\text{m}$ ,  
830 and 20  $\mu\text{m}$  in E.

831

832

**A** visual motion responses of LPC1 neuron split-GAL4 lines driving two neuronal silencers

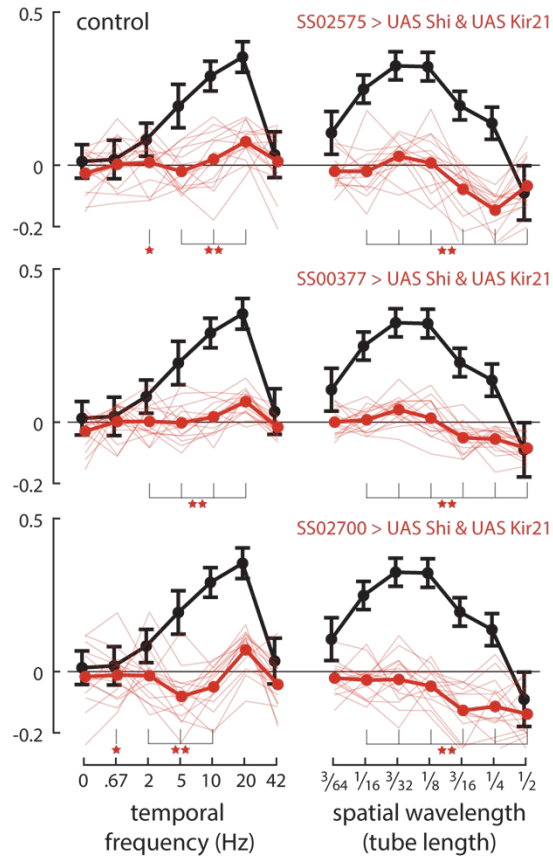

**B** additional split-GAL4 lines with LPC1 expression

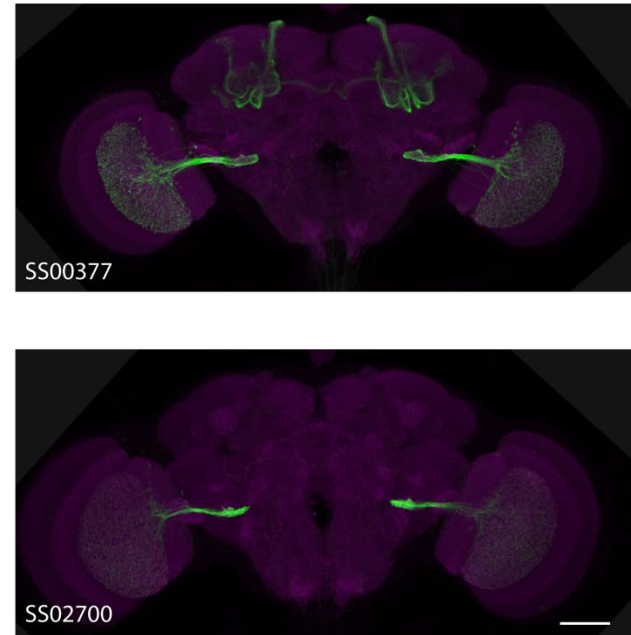

**C** Ventral Nerve Cord expression of split-GAL4 lines

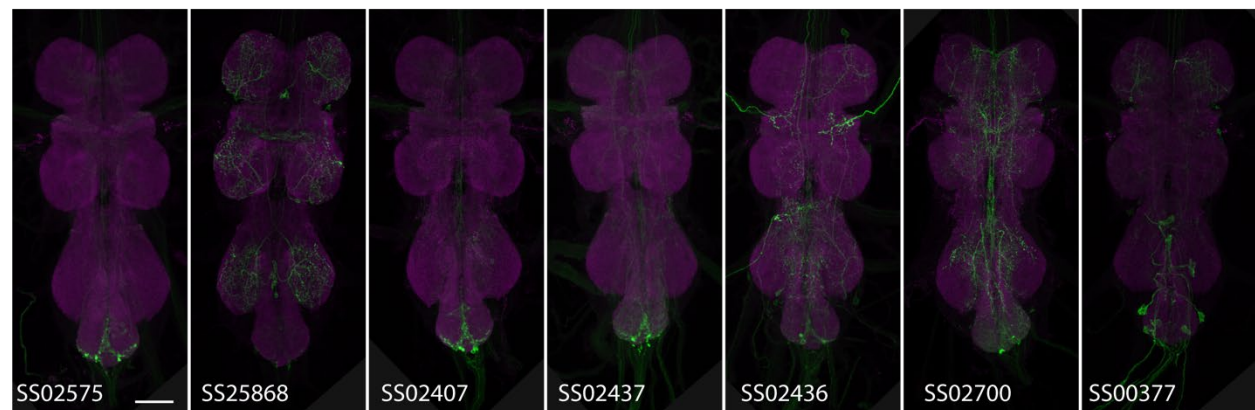

833

834 **Fig. S3, related to Figs. 2, 3. Fly Vision Box motion responses for additional LPC1 driver**  
 835 **lines, and extended expression patterns for split-GAL4 lines.**

836 (A) Summary data for 3 additional split-GAL4 lines targeting expression in the LPC1 neurons.

837 In these experiments, the neurons were ‘doubly silenced’ using both *Shibire<sup>ts1</sup>* and *Kir2.1*,

838 expected to interfere with distinct aspects (synaptic transmission and membrane excitability) of

839 neuronal function. These data are plotted following the conventions of Fig. 3B: control genotype  
840 mean  $\pm$  s.d. in black, and for the 3 experimental genotypes, the individual tube mean Direction  
841 Index is shown as thin lines, and the means across tubes as thicker lines (15-18 tubes from 3  
842 experiments for all experimental and control genotypes). Statistical significance between  
843 experimental and control genotypes determined using Mann-Whitney U-test controlled for False  
844 Discovery Rate: 1 star =  $p < 0.05$ ; 2 stars =  $p < 0.01$ . (B) Expression patterns of the two  
845 additional LPC1 driver lines (displayed as in Fig. 3A). Scale bar, 50  $\mu\text{m}$ . (C) Ventral Nerve Cord  
846 expression of the driver lines in Figs. 3 and S3. Scale bar, 50  $\mu\text{m}$ . Genotypes used in this Figure  
847 detailed in Table 1.

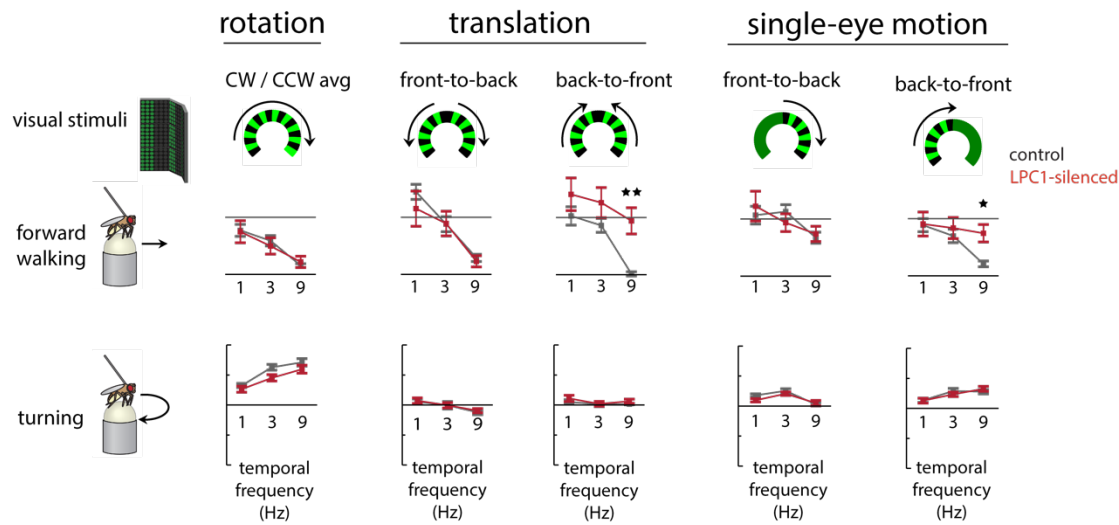

848

849

850 **Fig. S4, related to Fig. 4. Visual motion responses of flies with LPC1 neurons silenced.**

851 A) Top: Grating patterns presented to tethered flies using a cylindrical LED arena (stimuli

852 schematized with top-down view of arena). Middle: The forward component of the walking

853 responses of tethered flies (n=20 LPC1-silenced flies in red; n=20 genetic control flies in black)

854 to presentations of rotational and translational motion stimuli (at 1 Hz, 3 Hz, and 9 Hz temporal

855 frequency, presented for 2 s), displayed as mean  $\pm$  SEM. Bottom: Mean turning component of

856 the walking behavior of flies, from the same data set as above. LPC1-silenced flies walked

857 significantly more (or slowed down less) than control flies only in response to 9 Hz full-field and

858 9 Hz single-eye back-to-front motion (statistical significance determined using Mann-Whitney

859 U-test controlled for False Discovery Rate: 1 star =  $p < 0.05$ ; 2 stars =  $p < 0.01$ ).

860

861



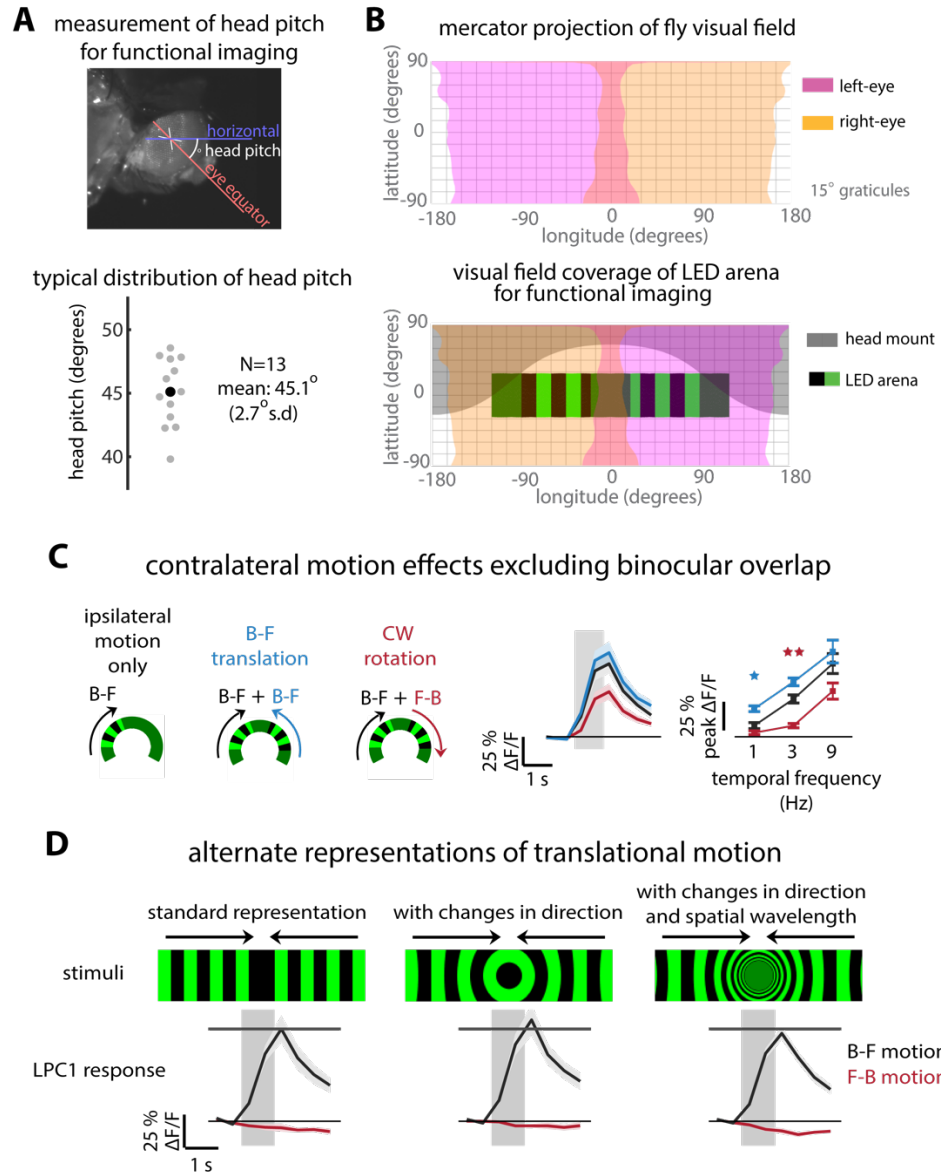

862

863 **Fig. S5, related to Fig. 5. Visual stimulus design considerations for measuring translational**  
 864 **motion responses in LPC1 neurons.**

865 (A) Measurement of head angle of flies mounted for functional imaging experiments. The fly  
 866 head is typically pitched 40-50° downward to allow access to the posterior side of the brain.

867 (B) Approximate mapping of the fly's field of view during the imaging experiments, used to  
 868 inform stimulus design (based on prior work<sup>67,68</sup>). For monocular stimuli, designed to be visible  
 869 by only one eye, the motion patterns are designed to start 20° from the midline of the fly's field  
 870 of view to avoid the region of binocular overlap. Small-field stimuli (shown in Figs. 5B, 6B, and  
 871 7E) were designed to stop at 90° from the midline (directly to the side) to avoid occlusions by the  
 872 head mount, which could cause some confounding motion cues. (C) The left LPC1 population

873 responses are significantly modulated by the direction of motion presented to the contralateral  
874 eye, as in Fig. 5E, but here for stimuli that exclude the region of binocular overlap (n=10 flies).  
875 (D) Forward/backward translational stimuli can be rendered with higher fidelity on our  
876 cylindrical display by including changes in direction and spatial wavelength. The calcium  
877 responses of LPC1 neurons (plotted as mean  $\pm$  SEM; n=6 flies) is not significantly altered by  
878 different types of back-to-front translation stimuli. Based on the set of stimuli we tested, the  
879 horizontal component of the translational motion and the combination of left/right directions on  
880 each eye appear to be the primary determinants of LPC1 population responses.



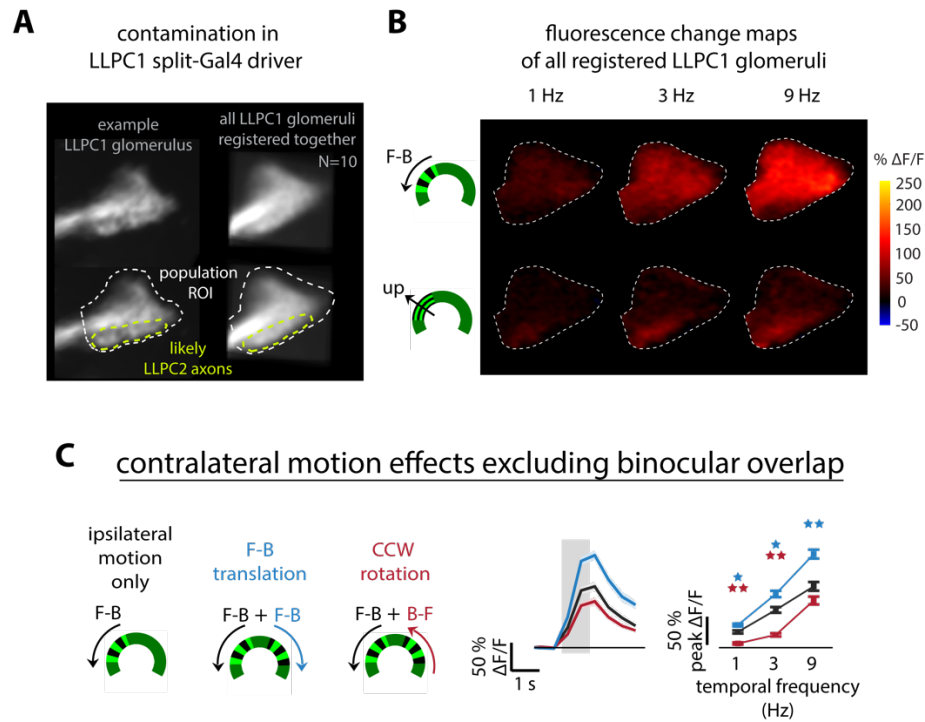

892

893 **Fig. S7, related to Fig. 6. Expanded results from LLPC1 imaging experiments.**

894 (A) Functional imaging of LLPC1 with genetically targeted expression of GCaMP6m is likely  
 895 contaminated by the axons of LLPC2 neurons present in the inferior margin of the LLPC1  
 896 glomerulus. (B) The superior side of the LLPC1 glomerulus is strongly activated by front-to-  
 897 back motion, as expected from the inputs LLPC1 dendrites receive in Lobula Plate layer 1 (Fig.  
 898 2). In this driver line (see Table 1), the inferior margin of the LLPC1 glomerulus is consistently  
 899 most selective to upward motion (analysis summarizes measurements from the registered  
 900 glomeruli of n=10 flies). The LLPC1 split-GAL4 driver line likely contains some LLPC2  
 901 neurons, explaining this mixed selectivity, but with spatially separated responses indicating  
 902 distinct populations of neurons. (C) The left LLPC1 population responses are significantly  
 903 modulated by the direction of motion presented to the contralateral eye, as in Fig. 6E, but here  
 904 for stimuli that exclude the region of binocular overlap, similar to LPC1 (Fig. S5C) but for the  
 905 opposite directions of motion (n=10 flies).

906

907

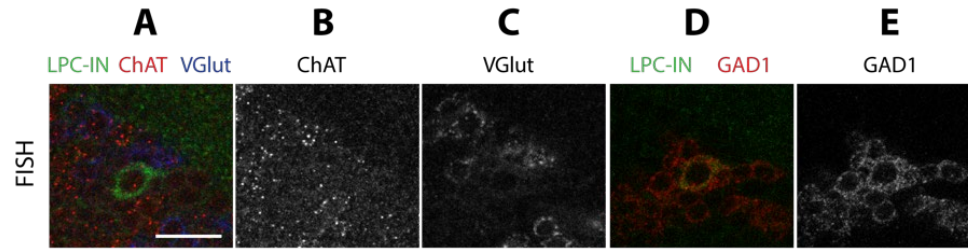

908

909 **Fig. S8, related to Fig. 7 FISH labelling supports a GABAergic phenotype of the LPC-IN**

910 **neuron**

911 FISH (fluorescence in situ hybridization) labelling<sup>69</sup> reveals the likely neurotransmitter phenotype

912 of the LPC-IN cell. The LPC-IN cell (green) shows above background FISH signal with probes

913 for GAD1, but not for ChAT and VGlut, suggesting that this cell type is GABAergic. Scale bar,

914 10  $\mu$ m.

915

916 **Table 1. List of genotypes (outside of the GAL4 screen) used throughout the manuscript.**

| Genotype details for all anatomy figures |                                                                                                                                                            |                                                                                                                                                                                                                                      |                                                                                                                                       |
|------------------------------------------|------------------------------------------------------------------------------------------------------------------------------------------------------------|--------------------------------------------------------------------------------------------------------------------------------------------------------------------------------------------------------------------------------------|---------------------------------------------------------------------------------------------------------------------------------------|
| Figure                                   | Driver line(s) and cell type targeted                                                                                                                      | Reporter transgene(s)                                                                                                                                                                                                                | Description                                                                                                                           |
| 1F                                       | <i>R33D06,R14F09,R67C07,R80G09</i>                                                                                                                         | <i>pJFRC2-10XUAS-IVS-mCDGFP</i>                                                                                                                                                                                                      | GAL4 line images from Jenett et al                                                                                                    |
| 1G                                       | <i>SS02575 (R81A05-p65AD (attP40); VT031495-DBD (attP2))</i> (LPC1)                                                                                        | <i>pJFRC51-3XUAS-IVS-syt::smHA (su(Hw)attP1)</i> , <i>pJFRC225-5XUAS-IVS-myr::smFLAG (VK00005)</i> (only myr::smFLAG pattern shown)                                                                                                  | Overlay of LPC1 cells with BACM                                                                                                       |
| 2A                                       | See 2,B,C,D,E                                                                                                                                              | See 2B,C,D,E                                                                                                                                                                                                                         | Composite of images in 2B,C,D,E with reference brain pattern (63x objective)                                                          |
| 2B                                       | <i>SS02575 (R81A05-p65AD (attP40); VT031495-DBD (attP2))</i> (LPC1)                                                                                        | <i>pJFRC51-3XUAS-IVS-syt::smHA (su(Hw)attP1)</i> , <i>pJFRC225-5XUAS-IVS-myr::smFLAG (VK00005)</i> (only myr::smFLAG pattern shown)                                                                                                  | Composite of registered images with reference brain pattern (63x objective)                                                           |
| 2C                                       | <i>SS25868 (VT032900-p65AD (attP40); VT016114-DBD (attP2))</i> (LPC2)                                                                                      | <i>pJFRC51-3XUAS-IVS-syt::smHA (su(Hw)attP1)</i> , <i>pJFRC225-5XUAS-IVS-myr::smFLAG (VK00005)</i> (only myr::smFLAG pattern shown)                                                                                                  | Composite of registered images with reference brain pattern (63x objective)                                                           |
| 2D                                       | <i>SS02407 (VT057342-p65AD (attP40); VT044492-DBD (attP2))</i> [LLPC1, (LLPC2)]                                                                            | <i>pJFRC51-3XUAS-IVS-syt::smHA (su(Hw)attP1)</i> , <i>pJFRC225-5XUAS-IVS-myr::smFLAG (VK00005)</i> (only myr::smFLAG pattern shown)                                                                                                  | Composite of registered images with reference brain pattern (63x objective)                                                           |
| 2E                                       | <i>SS02436 (VT029598-p65AD (attP40); VT046081-DBD (attP2))</i> (LLPC2,LLPC3)                                                                               | <i>pJFRC51-3XUAS-IVS-syt::smHA (su(Hw)attP1)</i> , <i>pJFRC225-5XUAS-IVS-myr::smFLAG (VK00005)</i> (only myr::smFLAG pattern shown)                                                                                                  | Composite of registered images with reference brain pattern (63x objective)                                                           |
| 2F                                       | <i>SS02575</i> (LPC1)                                                                                                                                      | MCFO-1 [ <i>pBPhsFlp2::PEST (attP3)</i> ];; <i>pJFRC201-10XUAS-FRT&gt;STOP&gt;FRT-myr::smGFP-HA (VK00005)</i> , <i>pJFRC240-10XUAS-FRT&gt;STOP&gt;FRT-myr::smGFP-V5-THS-10XUASFRT&gt;STOP&gt;FRT-myr::smGFP-FLAG (su(Hw)attP1)</i> ] | Composite of registered images with reference brain pattern; cells from multiple specimens (63x objective)                            |
| 2G                                       | <i>SS25868</i> (LPC2), <i>SS02436</i> (LLPC2,LLPC3), <i>SS02437 (VT048351-p65AD (attP40); VT057342-DBD (attP2))</i> [LLPC1,(LLPC2)], <i>SS02575</i> (LPC1) | <i>pJFRC51-3XUAS-IVS-syt::smHA (su(Hw)attP1)</i> , <i>pJFRC225-5XUAS-IVS-myr::smFLAG (VK00005)</i> (only myr::smFLAG pattern shown)                                                                                                  | Single slices of composite image stack of registered images and reference brain; different channel combinations shown (63x objective) |
| 2H                                       | <i>SS00324 (R59E08-p65AD (attP40); R42F06-DBD (attP2))</i> (T4/T5), <i>SS02575</i> (LPC1)                                                                  | <i>pJFRC51-3XUAS-IVS-syt::smHA (su(Hw)attP1)</i> , <i>pJFRC225-5XUAS-IVS-myr::smFLAG (VK00005)</i> ( <i>SS00324</i> , only syt::smHA pattern shown), MCFO-1 ( <i>SS02575</i> )                                                       | Composite of registered images with reference brain pattern (63x objective)                                                           |
| 2I                                       | <i>SS02575</i> (LPC1), <i>SS25868</i> (LPC2), <i>SS02406</i> (LLPC1), <i>SS02436</i> (LLPC2,LLPC3)                                                         | MCFO-1                                                                                                                                                                                                                               | MCFO-labeled cells with anti-Brp (mAb Nc82) labeling<br>Projections through resampled, cropped volumes                                |

|           |                                                                                                                       |                                                                                                                                     |                                                                                                                                       |
|-----------|-----------------------------------------------------------------------------------------------------------------------|-------------------------------------------------------------------------------------------------------------------------------------|---------------------------------------------------------------------------------------------------------------------------------------|
|           |                                                                                                                       |                                                                                                                                     | of the original confocal stacks (63x objective)                                                                                       |
| 2J        | SS02575 (LPC1)                                                                                                        | MCFO-1                                                                                                                              | Composite of registered images with reference brain pattern; cells from multiple specimens (63x objective)                            |
| S2A       | SS25868 (LPC2)                                                                                                        | MCFO-1                                                                                                                              | Composite of registered images with reference brain pattern (63x objective)                                                           |
| S2B       | SS02437(LLPC1)                                                                                                        | MCFO-1                                                                                                                              | Composite of registered images with reference brain pattern (63x objective)                                                           |
| S2C       | SS02422 (VT046081-p65AD (attP40); VT029598-DBD(attP2)) (LLPC2)                                                        | MCFO-1                                                                                                                              | Composite of registered images with reference brain pattern (63x objective)                                                           |
| S2D       | SS02422 (LLPC3)                                                                                                       | MCFO-1                                                                                                                              | Composite of registered images with reference brain pattern (63x objective)                                                           |
| S2E       | SS25868 (LPC2)                                                                                                        | MCFO-1                                                                                                                              | Composite of registered images with reference brain pattern; cells from multiple specimens (63x objective)                            |
| S2F       | SS02406 (LLPC1)                                                                                                       | MCFO-1                                                                                                                              | Composite of registered images with reference brain pattern; cells from multiple specimens (63x objective)                            |
| S2G       | SS02436 (LLPC2), SS02422 (LLPC2)                                                                                      | MCFO-1                                                                                                                              | Composite of registered images with reference brain pattern; cells from multiple specimens (63x objective)                            |
| S2H       | SS02436 (LLPC3), SS02422 (LLPC3)                                                                                      | MCFO-1                                                                                                                              | Composite of registered images with reference brain pattern; cells from multiple specimens (63x objective)                            |
| 3B,5A,6 A | SS02575 (LPC1), SS025868 (LPC2), SS02407 [LLPC1,(LLPC2)], SS02437 [LLPC1,(LLPC2)], SS22436 (LLPC2,LLPC3)              | <i>pJFRC51-3XUAS-IVS-syt::smHA (su(Hw)attP1)</i> , <i>pJFRC225-5XUAS-IVS-myr::smFLAG (VK00005)</i> (only myr::smFLAG pattern shown) | Maximum intensity projection with anti-Brp (mAb Nc82) labeling (20x)<br><br>Figure 5A/6A include S02575/SS02407 images from Figure 3B |
| S3B       | LPC1 drivers: SS02700 (R81A05-p65AD (attP40); VT043014-DBD(attP2)), SS00377(R81A05-p65AD (attP40); R72G06-DBD(attP2)) | <i>pJFRC51-3XUAS-IVS-syt::smHA (su(Hw)attP1)</i> , <i>pJFRC225-5XUAS-IVS-myr::smFLAG (VK00005)</i> (only myr::smFLAG pattern shown) | Maximum intensity projection with anti-Brp (mAb Nc82) labeling (20x objective)                                                        |
| S3C       | SS02575, SS25886, SS02407, SS22437, SS22436, , SS00377                                                                | <i>pJFRC51-3XUAS-IVS-syt::smHA (su(Hw)attP1)</i> , <i>pJFRC225-5XUAS-IVS-myr::smFLAG (VK00005)</i> (only myr::smFLAG pattern shown) | Maximum intensity projection with anti-Brp (mAb Nc82) labeling (20x objective)                                                        |
| 4D        | SS02575 (LPC1)                                                                                                        | <i>w+,pJFRC300-20XUAS-FRT&gt;-dSTOP-FRT&gt;-CsChrimson-</i>                                                                         | Maximum intensity projection with anti-Brp (mAb Nc82) labeling                                                                        |

|                                                                   |                                                                                                                                                                        |                                                                                                                                                                                                                                                                      |                                                                                                          |
|-------------------------------------------------------------------|------------------------------------------------------------------------------------------------------------------------------------------------------------------------|----------------------------------------------------------------------------------------------------------------------------------------------------------------------------------------------------------------------------------------------------------------------|----------------------------------------------------------------------------------------------------------|
|                                                                   |                                                                                                                                                                        | <i>mVenus(attP18),pBPhsFlp2::PEST(attP3)</i>                                                                                                                                                                                                                         | (20x objective)                                                                                          |
| 7A                                                                | <i>SS02575</i> (LPC1), <i>SS02407</i> (LLPC1,(LLPC2)), <i>SS34215</i> ( <i>VT002033</i> - <i>p65AD</i> ( <i>attP40</i> ); <i>R78A06-DBD</i> ( <i>attP2</i> )) (LPC-IN) | <i>pJFRC51-3XUAS-IVS-syt::smHA</i> ( <i>su(Hw)attP1</i> ), <i>pJFRC225-5XUAS-IVS-myr::smFLAG</i> ( <i>VK00005</i> ) (only myr::smFLAG pattern shown for <i>SS34215</i> ; illustrated glomeruli are based on syt::smHA patterns of <i>SS2575</i> and <i>SS02407</i> ) | Composite of registered images with reference brain pattern and glomerulus labels<br><br>(63x objective) |
| 7B                                                                | <i>SS34215</i> (LPC-IN)                                                                                                                                                | <i>pJFRC51-3XUAS-IVS-syt::smHA</i> ( <i>su(Hw)attP1</i> ), <i>pJFRC225-5XUAS-IVS-myr::smFLAG</i> ( <i>VK00005</i> )                                                                                                                                                  | Composite of registered images with reference brain pattern<br><br>(63x objective)                       |
| 7C,C'                                                             | See 7B                                                                                                                                                                 | See 7B                                                                                                                                                                                                                                                               | Single confocal slices (63x objective)                                                                   |
| 7D,D'                                                             | <i>SS34215</i> (LPC-IN), <i>MI09277-LexA:QFAD</i> (GAD1-LexA)                                                                                                          | <i>pJFRC19-13XLexAop2-IVS-myr::GFP</i> ( <i>su(hw)attP8</i> ), <i>pJFRC21-10XUAS-IVS-mCD8::RFP</i> ( <i>attP18</i> )                                                                                                                                                 | Single confocal slices<br>(63x objective)                                                                |
| S8                                                                | <i>SS034215</i>                                                                                                                                                        | <i>UAS-7xHaloTag::CAAX</i> ( <i>VK00005</i> )<br>GAD1, ChAT, VGlut FISH probes                                                                                                                                                                                       | Single confocal slices<br>(63x objective)                                                                |
| <b>Genotypes for the behavior and Calcium imaging experiments</b> |                                                                                                                                                                        |                                                                                                                                                                                                                                                                      |                                                                                                          |
| 3A, 4B-C, S4                                                      | <i>w; BPP65ADZp</i> ( <i>attP40</i> ); <i>BPZpGdbd</i> ( <i>attP2</i> )<br>(enhancerless split GAL4)                                                                   | <i>w+(DL);;UAS-Shibire<sup>ts1</sup></i>                                                                                                                                                                                                                             | Shibire (silencing) control genotype                                                                     |
| 3A, 4B-C, S4                                                      | <i>SS02575</i> (LPC1)                                                                                                                                                  | <i>w+(DL);;UAS-Shibire<sup>ts1</sup></i>                                                                                                                                                                                                                             | Shibire (silencing)                                                                                      |
| 3A                                                                | <i>SS25868</i> (LPC2)                                                                                                                                                  | <i>w+(DL);;UAS-Shibire<sup>ts1</sup></i>                                                                                                                                                                                                                             | Shibire (silencing)                                                                                      |
| 3A,S6                                                             | <i>SS02407</i> (LLPC1, some LLPC2)                                                                                                                                     | <i>w+(DL);;UAS-Shibire<sup>ts1</sup></i>                                                                                                                                                                                                                             | Shibire (silencing)                                                                                      |
| 3A                                                                | <i>SS02437</i> (LLPC1, LLPC2)                                                                                                                                          | <i>w+(DL);;UAS-Shibire<sup>ts1</sup></i>                                                                                                                                                                                                                             | Shibire (silencing)                                                                                      |
| 3A                                                                | <i>SS02436</i> (LLPC2, LLPC3)                                                                                                                                          | <i>w+(DL);;UAS-Shibire<sup>ts1</sup></i>                                                                                                                                                                                                                             | Shibire (silencing)                                                                                      |
| S3A                                                               | <i>w; BPP65ADZp</i> ( <i>attP40</i> ); <i>BPZpGdbd</i> ( <i>attP2</i> )<br>(enhancerless split GAL4)                                                                   | <i>w+(DL);UAS-Kir2.1;UAS-Shibire<sup>ts1</sup></i>                                                                                                                                                                                                                   | Shibire + Kir (double-silencing) control genotype                                                        |
| S3A                                                               | <i>SS02575</i> (LPC1)                                                                                                                                                  | <i>w+(DL);UAS-Kir2.1;UAS-Shibire<sup>ts1</sup></i>                                                                                                                                                                                                                   | Shibire + Kir (double-silencing)                                                                         |
| S3A                                                               | <i>SS00377</i> (LPC1)                                                                                                                                                  | <i>w+(DL);UAS-Kir2.1;UAS-Shibire<sup>ts1</sup></i>                                                                                                                                                                                                                   | Shibire + Kir (double-silencing)                                                                         |
| S3A                                                               | <i>SS02700</i> (LPC1)                                                                                                                                                  | <i>w+(DL);UAS-Kir2.1;UAS-Shibire<sup>ts1</sup></i>                                                                                                                                                                                                                   | Shibire + Kir (double-silencing)                                                                         |
| 4D                                                                | <i>SS02575</i> (LPC1)                                                                                                                                                  | <i>w+,pJFRC300-20XUAS-FRT&gt;-dSTOP-FRT&gt;-CsChrimson-mVenus</i> ( <i>attP18</i> ), <i>pBPhsFlp2::PEST</i> ( <i>attP3</i> )                                                                                                                                         | Chrimson (Unilateral and bilateral activation and control)                                               |
| 5B-E<br>S5C,D                                                     | <i>SS02575</i> (LPC1)                                                                                                                                                  | <i>w+(DL); pJFRC7-20XUAS-IVS-GCaMP6m</i> ( <i>VK00005</i> )                                                                                                                                                                                                          | GCaMP6m (imaging)                                                                                        |
| 6B-E,<br>S7                                                       | <i>SS02407</i> (LLPC1, some LLPC2)                                                                                                                                     | <i>w+(DL);; pJFRC7-20XUAS-IVS-GCaMP6m</i> ( <i>VK00005</i> )                                                                                                                                                                                                         | GCaMP6m(imaging)                                                                                         |
| 7E                                                                | <i>SS34215</i> (LPC1-IN)                                                                                                                                               | <i>w+(DL);; 20XUAS-Syn-OpGCamp6s</i> ( <i>su(Hw)attP1</i> )                                                                                                                                                                                                          | OpGCaMP6s(imaging)                                                                                       |



918 **METHODS**

919

920 *Flies:*

921 Flies were reared under standard conditions (60% humidity, 16h light / 8h dark, cornmeal agar  
922 diet) at 22° C for Fly Vision Box, tethered walking, and functional imaging experiments. Flies  
923 expressing CsChrimson were reared on a cornmeal agar diet supplemented with 0.4 mM all-  
924 trans-retinal. Fly Vision Box experiments were performed on male flies 4-5 days post-eclosion,  
925 imaging experiments on female flies 1-4 days post-eclosion, and tethered behavioral experiments  
926 on female flies 3-5 days post-eclosion. Cell type specific expression of indicators, silencers, and  
927 activators was achieved using the GAL4/UAS, LexA/LexAop, and Split-GAL4/UAS expression  
928 control systems<sup>44,52,53</sup>. We used previously described split-Gal4 driver lines<sup>54</sup> or constructed new  
929 drivers from existing hemidriver lines<sup>70,71</sup>. Expression of CsChrimson<sup>58</sup> in bilateral or unilateral  
930 (or empty) LPC1 populations was achieved using the FLP/FRT expression control system<sup>72</sup>,  
931 following a previously introduced method<sup>47</sup>. Tables 1 and S1 detail the complete list of the fly  
932 genotypes used in this study.

933

934 *Anatomical analyses:*

935 For imaging of split-GAL4 expression patterns, we used MCFO, a method for stochastic labeling  
936 of neurons in multiple colors, to visualize the anatomy of individual cells and targeted expression  
937 of membrane and presynaptic markers to reveal cell populations<sup>47,65</sup>. Sample preparation and  
938 imaging were carried out by the Janelia FlyLight Project Team. Protocols were as in previous  
939 studies<sup>47,65</sup> and are also available online ([https://www.janelia.org/project-](https://www.janelia.org/project-team/flylight/protocols)  
940 [team/flylight/protocols](https://www.janelia.org/project-team/flylight/protocols)). FISH detection of transcripts of GAD1, VGluT and ChaT used a recently  
941 described method<sup>69</sup>. Details of fly genotypes are provided in Table 1.

942

943 Images for anatomy figures were processed and displayed using Fiji<sup>73</sup> and FluoRender<sup>74</sup>. A brief  
944 summary of image processing for each figure panel is included in Table 1. To generate  
945 composites of multiple confocal images, image stacks were first registered to a template brain  
946 (JRC2018U)<sup>75</sup>. In a few cases, stacks were edited to exclude signal from other cells or  
947 background signals that would otherwise obscure relevant details in the views shown. Such

948 editing was not applied to the images of overall expression patterns (Figs. 3 and S3). Original  
949 image stacks will be made available online at <https://splitgal4.janelia.org/cgi-bin/splitgal4.cgi>.

950

951 *Preparation for Fly Vision Box experiments:*

952 Male flies of each genotype were cold-anesthetized and sorted into groups of 10-15 flies, then  
953 placed on “starvation media” (10-15 ml of 1% agar in water, in a standard fly vial), 1-4 hours  
954 prior to the start of experiments. Each group of flies was loaded into a custom-made clear acrylic  
955 corridor tube (interior dimensions: 3 mm × 10 mm × 120 mm, H × W × L) using a custom-made  
956 transfer-funnel.

957

958 *Preparation for tethered walking experiments:*

959 Flies were prepared for walking behavior experiments as previously detailed<sup>13</sup> and briefly  
960 summarized here. Wings of cold-anesthetized flies were immobilized with UV-curing glue  
961 (KOA 300-1; Kemxert) at least 12 h prior to the experiments. On the day of experiments, each  
962 fly was glued to a tungsten rod (catalog #71600; A-M Systems) by the thorax and placed into an  
963 incubator (model PH09-DM, Thermoelectric Series; Darwin Chambers Company) set to 32°C  
964 and 60% humidity for at least 25 min before the start of behavioral experiments. We recently  
965 detailed this method and lower-cost alternatives<sup>76</sup>.

966

967 *Preparation for calcium imaging:*

968 Flies were prepared for 2-photon calcium imaging experiments using a method based on  
969 previously described preparation<sup>55</sup> with several modifications as summarized here. Cold-  
970 anesthetized flies were tethered to a fine tungsten wire using UV-curing glue (Loctite 3972;  
971 Henkel). The two most anterior legs (T1) were severed and sealed with glue to prevent the fly  
972 from grooming and obstructing its visual field. The tethered fly was positioned up to the opening  
973 of a custom-machined PEEK plastic conical mount with its head pitched downward to allow  
974 access to the back of the head for dissection and imaging while obstructing as little of the fly’s  
975 visual field as possible<sup>41</sup>. The fly was glued to the mount at the rim of the head and the upper  
976 thorax, sealing most of the mount’s opening. The proboscis was glued to the severed legs to  
977 further immobilize the head. The back surface of the fly’s head was bathed in saline<sup>55</sup> and a hole  
978 in the cuticle was cut to expose the posterior lateral protocerebrum (PLP) region of the brain

979 using a fine tungsten needle and holder (Fine Science Tools #10130-05, # 26018-17). Muscles 1  
980 and 16<sup>77</sup> were severed to reduce motion of the brain within the head capsule and excess fat was  
981 removed from the surface of the brain to improve optical access. The complete procedure is  
982 shown in Movie S1.

983

984 *Optogenetics stimulation and experimental procedure:*

985 For optogenetic activation of CsChrimson (Fig. 4D), a 660 nm fiber-coupled LED (Thorlabs  
986 Deep Red M660F1) controlled by an LED driver (Thorlabs LEDD1B), set to ~0.7 A, was  
987 directed approximately 1 inch from the tethered fly with a light guide (400  $\mu\text{m}$ , 0.39 NA SMA to  
988 ceramic ferrule patch cable, Thorlabs FT400EMT). The LED was triggered using a signal, whose  
989 timing was controlled by analog output signals of our “G3” display controller<sup>56</sup>. After each  
990 optogenetic experiment, the fly brain was dissected and imaged with an epifluorescence  
991 microscope to record the location of CsChrimson expression (i.e., left optic lobe, right optic lobe,  
992 both, or neither).

993

994 *Visual stimuli:*

995 For the fly-on-ball experiments of Figs. 4, S4, S6, visual stimuli were presented to tethered flies  
996 using a 3<sup>rd</sup> generation, or “G3” cylindrical LED arena (manufactured by IO Rodeo, based on the  
997 design detailed at: <https://reiserlab.github.io/Modular-LED-Display/G3/>) constructed from 36,  
998 8x8 pixel LED modules containing green LEDs (UltraPure Green LED, IO Rodeo, 525 nm  
999 peak). The cylindrical arena covered 270° across the azimuth of the visual field and ~120° in  
1000 elevation. The maximal angular distance between pixels, determined from the flies’ position is  
1001 3.75°. This system is slightly updated from the published, earlier version<sup>56</sup>.

1002

1003 For calcium imaging experiments, visual stimuli were presented to tethered flies using a 4<sup>th</sup>  
1004 generation “G4” cylindrical arena constructed from 36 16x16 pixel LED panel containing green  
1005 (570 nm peak) LEDs<sup>41</sup>. The LED arena was pitched downward to match the head angle of the fly  
1006 determined under the dissection microscope so that the LED arena was aligned to the equator of  
1007 each the fly’s eyes (Fig. S5A,B). To further separate the yellow-green LED emission spectra  
1008 from GCaMP6m fluorescence, a long-wavelength passing gel filter (Deep Golden Amber, LEE

1009 Filters #135) was laid on top of the LEDs along with a diffusing filter (Full White Diffusion  
1010 filter, LEE filters #216) to prevent reflections from the gel filter.

1011

1012 Patterns displayed on either LED arena were generated using a set of MATLAB scripts for  
1013 parameterizing and visualizing moving grating patterns for this display system. These tools have  
1014 since been integrated into a GUI (described here<sup>41</sup> and available here:

1015 <https://reiserlab.github.io/Modular-LED-Display/G4/>). All experimental stimuli consisted of  
1016 100% contrast square-wave gratings with a 30° spatial frequency. Brightness of stimuli was  
1017 modulated on a 0-15 (4-bit) range, with values of 15 and 0 typically used for bright and dark bars  
1018 in grating stimuli and a value of 7 for background and intermediate brightness frames. For  
1019 optomotor experiments with CsChrimson flies (Fig 4D), the display brightness was lowered to  
1020 reduce potential unintended optogenetic activation from the display, whose green LEDs emit  
1021 some longer wavelength light (brightness values of 2/1/0 were used for bright

1022 bar/background/dark bars). For tethered walking experiments, each visual stimulus trial began  
1023 with 2 seconds with the display set to a uniform, intermediate brightness (overall brightness does  
1024 not substantially change when the gratings appear), followed by 2 seconds of the moving grating  
1025 stimulus, followed by another 2 seconds of the intermediate brightness. For optogenetic  
1026 activation experiments, no grating pattern was displayed, but the uniform, intermediate  
1027 brightness pattern was displayed for 6 seconds with the 660nm LED turning on after 2 seconds  
1028 and remaining illuminated for 1 second. For calcium imaging experiments, a single trial  
1029 consisted of 2 seconds of uniform, intermediate intensity, followed by 1 second of moving  
1030 gratings, followed by 6 seconds of the uniform, intermediate display. The increased time in  
1031 between stimulus trials was added to allow GCaMP6m fluorescence signal to return to baseline  
1032 levels. Experiments were organized using a randomized block trial structure. Within each block,  
1033 the complete set of visual stimuli were presented in a randomized order, and multiple blocks  
1034 were presented such that each stimulus was shown at least 3 times. For imaging experiments,  
1035 every trial was repeated 3 times; for most behavioral experiments, trials were repeated 4 times;  
1036 and for optogenetic activation experiments (1 s stimulation by the 660 nm LED with the uniform  
1037 visual stimulus), trials were repeated 15 times.

1038

1039 *Fly Vision Box experiment:*

1040

1041 The Fly Vision Box was developed at the Janelia Research Campus as a high-throughput assay  
1042 integrating several tests of visually guided behavior for flies in tubes, including phototaxis,  
1043 visual motion following, and color preference. The transparent tubes were custom made from  
1044 acrylic (interior dimensions: 10 mm × 3 mm × 120 mm, W × H × L), to allow flies a corridor to  
1045 run up/down, while preventing flies from walking over each other, simplifying both the behavior  
1046 and our ability to track it. Each tube is capped on both end with a custom machined, transparent  
1047 acrylic plug that solidly seals each corridor. Each endcap also houses a 0.125” cube magnet,  
1048 glued into a machined slot, for alignment of each tube into the box’s lid. 5 boxes in total were  
1049 built, 4 of these were used to conduct experiments for the GAL4 line screen summarized in  
1050 Figure 1 and Table S1.

1051

1052 The apparatus is a temperature-controlled box that holds 6 tubes. Temperature control was  
1053 implemented via 2 Peltier elements mounted on the side of the box, with fans mounted on either  
1054 side for air exchange. On either side of every tube is a row of 64 green (572 nm peak), surface  
1055 mount LEDs, mounted on a custom designed Printed Circuit Board (PCB). The PCB houses an  
1056 Atmega168 microcontroller and is essentially an elongated G3 LED panel<sup>56</sup> (but supporting 2  
1057 LEDs per pixel, mirrored on each side of the board), scanning the LEDs and being controlled  
1058 using the same code and protocol. A single green (564 nm peak) and a single UV (350 nm peak)  
1059 LED are mounted on a small PCB at each end of each corridor. These LEDs are intensity  
1060 controlled for phototaxis and color preference experiments by another Atmega microcontroller  
1061 (ATmega644, Atmel). The tubes are suspended from the top-plate that seals the box (and aligned  
1062 by magnets onto posts). 4 small vibrating ‘pager’ type motors are mounted onto the sides of the  
1063 top plate to provide a mechanical startle for the walking flies. A camera (Basler A602f) mounted  
1064 above the box records fly movements at 25 frames/s. The camera is fitted with an Infrared-  
1065 passing filter and the tubes are suspended above an Infrared backlight (Advanced Illumination,  
1066 880 nm LEDs). The camera records videos that are stored for off-line tracking and analysis.

1067

1068 The Fly Vision Box is controlled via software that provides deterministic timing of the  
1069 experimental protocol. After many iterations to optimize the reliability of the measured  
1070 behavioral responses of control flies, the experimental protocol (v3.1) that was run for the Gen1

1071 GAL4 line screen consisted of 5 sequences, run twice, once at 24°C and a second time at an  
1072 elevated temperate of 34°C:

1073 (1) 180 s acclimation period, during which the flies are in the dark. The last 2 minutes of the trial  
1074 are recorded.

1075 (2) 180 s test of mechanical startle responses. Every 30s a 100 ms vibration is delivered by the 4  
1076 pager motors. 6 repetitions total (in subsequent trials, the same 100 ms vibration is paired with  
1077 the start of each condition).

1078 (3) 240 s test of visual motion responses. Every 10 s, a vibration is delivered by the pager  
1079 motors, and a visual motion stimulus is presented at one of 6 speeds (0, 1, 4, 8, 20 and 42 Hz).  
1080 The pattern is composed of 2 LED pixels on, and then 2 pixels off, running the length of the  
1081 tube. The update rate is calculated such that these temporal frequencies are displayed (pattern  
1082 shifts by one pixel every 0, 250, 63, 31, 13, and 6 ms respectively). The motion is directed  
1083 towards one end of the tubes, then towards the other end in the subsequent 10 second trial. The  
1084 complete protocol includes 4 repetitions of each speed. Control behavior summarized in Figure  
1085 S1B.

1086 (4) 120 s test of phototaxis behavior. Every 15 s, a vibration is delivered by the pager motors,  
1087 and a single LED is illuminated at one end of the tube, before the same color LED is illuminated  
1088 on the opposite side of the tube. There are 4 conditions (GL: Green Low, 25; GH: Green High,  
1089 120; UL: UV low, 36; UH: UV high, 200). The complete protocol includes 4 repetitions of each  
1090 condition. Control behavior summarized in Figure S1C.

1091 (5) 240 s test of color/spectral preference. Every 15 s, a vibration of the pager motors is  
1092 accompanied by a condition similar to phototaxis, but where at one end a UV LED was  
1093 illuminated with a different (relative) intensity (0, 12, 24, 36, 48, 60, 72, 84), while the other end  
1094 was illuminated with a green LED at a fixed intensity (120). Control behavior summarized in  
1095 Figure S1D.

1096

1097 After this screen was carried out, we expanded the protocol to measure these behaviors more  
1098 thoroughly. During this process, we found that we could not reliably measure visual responses to  
1099 lower contrast visual motion stimuli. Our understanding is that flies experience these optomotor  
1100 patterns as high-brightness but already low-contrast stimuli due to internal reflections and the  
1101 opposing rows of LEDs illuminating each other. To overcome this limitation, the updated

1102 protocol (v5.27 and v5.34, identical but with the order of sequences changed) was carried out  
1103 with one side of each tube's LEDs covered with black laboratory tape. The enhanced protocol  
1104 consisted of 8 sequences, carried out while the box is heated to 34°C (no 24°C experiments, and  
1105 the entire duration is slightly variable since the experiment doesn't begin until the box has  
1106 achieved the elevated temperature):

1107 (1) A "startle" response test identical to sequence 2 from the protocol above.

1108 (2) 280 s visual motion response test leading to a temporal frequency tuning curve, as above,  
1109 except that the moving pattern consisted of 4 LEDs ON followed by 4 LEDs OFF (repeated  
1110 down the length of the tube), scrolling at 7 temporal frequencies (0, 0.67, 2, 5, 10, 21, and 42  
1111 Hz). Each stimulus was repeated 2 times in both directions for 4 total repetitions.

1112 (3) 200 s visual motion series testing different contrast levels over a mean intermediate  
1113 luminance. The pattern is 4 brighter pixels / 4 darker pixels repeating down the length of the  
1114 tube, moving at 5 Hz temporal frequency. 4-bit brightness intensity control allows possible  
1115 brightness values of 0-15. 5 contrast levels were tested: 0.07 (8/7), 0.2 (9/6), 0.5 (11/4), 0.7  
1116 (13/2), and 1 (15/0). Each stimulus was repeated 2 times in both directions for 4 total repetitions.

1117 (4) 200 s visual motion series testing different contrast levels, as above, but where the 5 stimuli  
1118 were chosen to maintain the brightest level: 0.1 (15/12), 0.3 (15/9), 0.4 (15/6), 0.7 (15/3), and 1  
1119 (15/0). Each stimulus was repeated 2 times in both directions for 4 total repetitions.

1120 (5) 280 s visual motion response test leading to a spatial wavelength tuning curve. 7 different  
1121 patterns composed of the following repeating sequences of on/off pixels were moved: (1/2, 2/2,  
1122 3/3, 4/4, 6/6, 8/8, and 16/16, corresponding to 3/64, 1/16, 3/32, 1/8, 3/16, 1/4, and 1/2 the length  
1123 of the tube), and the speed of movement was adjusted to approximate 10 Hz temporal frequency:  
1124 (32, 24, 16, 12, 8, 6, 3 ms per step, respectively). Each stimulus was repeated 2 times in both  
1125 directions for 4 total repetitions.

1126 (6) 120 s test of phototaxis behavior, same as seq 4 in v3.1, but here (GL: Green Low, 20; GH:  
1127 Green High, 120; UL: UV low, 15; UH: UV high, 200).

1128 (7) 440 s test of spectral preference, similar to seq. 5 in v3.1, but here the trials are 10 s each, and  
1129 11 different combinations are shown, where the UV LED is held at a constant intensity. On one  
1130 side, the UV LED is set to 10 while the green on the other end is set to 11 values (0, 3, 6, 10, 15,  
1131 20, 30, 50, 75, 100, and 200). Each combination was repeated 2 times in both directions for 4  
1132 total repetitions.

1133 (8) A 440 s test of spectral preference, as in (7) above, but here the green LED is held at a  
1134 constant intensity of 100 while the opposite—side UV LED is set to 11 values (0, 5, 7, 10, 15,  
1135 25, 40, 55, 75, 100, and 200).

1136

1137 *Fly Vision Box analysis:*

1138 After each experiment was completed, the movies were analyzed offline. Extensive metadata and  
1139 protocol information (genotype, sex, DOB, age, time of day, rearing conditions, etc.) were stored  
1140 along with the experimental data. To minimize storage space and accelerate subsequent analysis,  
1141 the videos of all 6 tubes in each box were split into videos of individual tubes, and then further  
1142 compressed into static-background SBFMF files<sup>78</sup>. Fly positions were detected in each video  
1143 frame using background subtraction, and fly movements were tracked across frames using  
1144 software developed by Lihi Zelnik-Manor and Pietro Perona and used in prior work<sup>79</sup>. The  
1145 tracking and analysis code has been updated and maintained by Janelia Scientific Computing and  
1146 is available here: <https://github.com/JaneliaSciComp/box>. Since the tracking software did not  
1147 preserve the identity of individual flies, the most reliable metrics of directed walking behavior  
1148 were based on the (directional, median) walking velocity of all flies in each tube. We further  
1149 found that a direction index was an even more robust measure of behavior, that was less  
1150 confounded by experiment-to-experiment and genotype-to-genotype differences in walking  
1151 speeds. The direction index is defined as  $DI = \frac{F_p - F_{np}}{F_t}$ , where  $F_p$  is the number of flies moving  
1152 toward the preferred direction,  $F_{np}$  is the number of flies moving in the nonpreferred direction,  
1153 and  $F_t$  is the total number of flies detected in the corridor. The preferred and nonpreferred  
1154 directions are defined for each stimulus (opposite to the direction of motion for the visual motion  
1155 task, and towards the illuminated LED in the phototaxis behaviors). The DI is computed for each  
1156 tube, frame-by-frame, and then across trials.

1157

1158 The data in Figure 1 is based on the motion responses in sequence 3 of protocol v3.1, from the  
1159 second half of the experiment, when the box is held at an elevated (34°C) temperature. The  
1160 temporal frequency data and the spatial wavelength data in Figure 3 and Figure S3, are from the  
1161 responses in sequence 3 and 5 of protocol v5.27 (5 and 8 of v5.34).

1162



1163 The Behavior Anatomy Correlation Maps (Figure 1, and Figure S1) were produced using the  
1164 methods and code previously described<sup>46</sup>. The figures were produced by the BABAM package  
1165 (available: <https://github.com/kristinbranson/BABAM>), with settings similar to those used in  
1166 prior work: 10,000 samples, False Discovery Rate (FDR) = 0.25, logarithmic colormap  
1167 interpolation, min p-value = 0.0001, max p-value = 0.05 and are shown as maximum intensity  
1168 projections of full-brain volumetric data. In Figure 1E, the top plot is based on the metric  
1169 ‘MedVelDark\_minus’ (median walking velocity in the dark) and the bottom BACM is based on  
1170 ‘DI\_Fast\_minus\_ANDNOT\_ND\_MedVel\_Fast\_minus’ – this compound result uses a logical  
1171 operation on 2 metrics, a reduction (relative to control) in the direction index during the fast  
1172 motion trials (20 and 42 Hz) and no reduction in non-directional walking during this same trials.  
1173 This combination produces a slightly ‘cleaner’ map by eliminating regions that appear to affect  
1174 walking during these fast motion trials, but not in a directional manner. The BACMs based on  
1175 the individual metrics used in this analysis are shown in Figure S1, where the DI reduction  
1176 BACM is shown for each walking speed (in E). At elevated speeds, the PLP  
1177 ‘hotspot’ is clearly seen, but additional regions in the central brain also become prominent.  
1178 However, the ‘recruitment’ of these regions may have more to do with high levels of locomotion  
1179 from these agitated flies, and not with visual motion processing. The clearest evidence for this is  
1180 the non-directional walking velocity reduction BACM shown in F, where a significant role for  
1181 expression in e.g., the antenna lobes and the SEZ is found, and these are the overlapping regions  
1182 that are reduced in the BACM of Fig. 1E, lower. All Behavior Anatomy Correlation Maps based  
1183 on the visual motion behavior from sequence 3 of protocol v3.1. The screen data not shown in  
1184 these figures is summarized in Table S1.

1185

#### 1186 *Tethered walking equipment and analysis:*

1187 The methods used for these behavioral experiments have been detailed elsewhere<sup>13,55</sup> and are  
1188 summarized here. Tethered flies were positioned onto an air-supported foam ball using a 3-axis  
1189 micromanipulator and two cameras (Firefly MV FFMV-03M2M and Basler 602f) that imaged  
1190 the fly and ball from above and behind, for alignment. The foam ball was cut from FR-7120  
1191 material, measured 9 mm diameter and 129 mg, was supported by 340 SCCM airflow, regulated  
1192 by a digital mass flow controller (Smart-Trak, Sierra Instruments). The complete setup, which  
1193 included the visual LED arena<sup>56</sup> and the treadmill system<sup>55</sup> was housed within the incubator.

1194 Behavioral experiments were conducted at 34°C and 60% humidity. The ball movement was  
1195 tracked by two optical flow cameras (ADNS-6090; Avago Technologies) that measure image  
1196 displacements. These measurements were acquired by a custom MATLAB (MathWorks, Natick,  
1197 MA) program that runs the experiment, and these signals were transformed into 100 Hz  
1198 measurements of forward, sideslip, and turning measurements (ball pitch, roll, and yaw), in  
1199 arbitrary units. These measurements of displacement are scaled by 100/s to generate velocity  
1200 signals (in arbitrary units per second).

1201

1202 Only turning and forward measurements were analyzed and described in this work. The time-  
1203 series of turning and forward measurements in response to multiple repetitions of each visual  
1204 stimulus were averaged together to produce a mean turning and forward response for each fly,  
1205 and this was computed for all visual stimuli. For the mean time-series of turning, all flies of a  
1206 single genotype were then normalized to the 98<sup>th</sup> percentile turning measurement of all flies from  
1207 that genotype (a more robust procedure than normalizing to peak), which scaled the values to  
1208 range from approximately -1 to +1, where -1 represents an approximately maximum yaw left  
1209 (counter-clockwise) turn and +1 indicates an approximately maximum yaw right (clockwise)  
1210 turn. For the average time-series of forward walking, all flies of a single genotype were  
1211 normalized to the mean forward measurement during the 0.5 seconds prior to all visual stimuli  
1212 (at the end of the 2 seconds of intermediate, uniform brightness that preceded all experimental  
1213 stimuli). This procedure scales the values such that +1 represents the baseline forward walking  
1214 prior to the start of experimental visual stimuli and 0 represents no forward walking. When  
1215 appropriate, behavior measurements from left/right symmetric stimuli are averaged together for  
1216 each fly individually: For full-field clockwise and counterclockwise rotation (e.g. Figure 4B,  
1217 left), forward walking responses to both stimuli are averaged, while turning responses are  
1218 “flipped and averaged” (left turns from CCW stimuli sign flipped and averaged with right turns  
1219 from CW stimuli). For single-eye stimuli (e.g. Figure 4B, right), forward walking from right-eye  
1220 B-F stimuli is averaged with that of left-eye B-F stimuli, while left turns from right-eye B-F is  
1221 flipped and averaged with left-eye B-F (single-eye F-B stimuli is processed similarly). For  
1222 summary plots, a single value of the turning and forward responses was calculated from the time-  
1223 series by averaging the mean time-series values during the 2<sup>nd</sup> half of open-loop visual stimulus  
1224 presentation, excluding the 1<sup>st</sup> half of the open-loop section to ignore the visuo-motor delay

1225 period and transients. Both time-series and summary data are plotted as the mean of all flies of a  
1226 single genotype +/- SEM.

1227

1228 *2-photon imaging and analysis:*

1229 Imaging the fluorescent calcium indicator signals from neurons expressing GCaMP in the  
1230 posterior lateral protocerebrum (PLP) of the fly brain was conducted using a two-photon  
1231 microscope (Prairie Ultima) with near-infrared excitation (930nm, Coherent Chameleon Ultra II)  
1232 and a 40x objective (Nikon CFI APO 60XW). The excitation power never exceeded 25 mW at  
1233 the sample. T-series of z-stacks (z-series) were taken at 128x128x5 pixel resolution (0.446  
1234  $\mu\text{m}/\text{pixel}$  along x and y axes and 5  $\mu\text{m}/\text{pixel}$  in z-axis, resulting in a 57x57x25  $\mu\text{m}$  imaging  
1235 volume) at a rate of 2.02 Hz, using galvo-galvo scanning in the x and y dimensions and piezo  
1236 scanning in the z-dimension. For each experimental condition, 10 z-stacks were acquired,  
1237 precisely synchronized to the visual stimulus. Acquisition was triggered to start 2 seconds before  
1238 the experimental visual stimulus was displayed, using the on-board analog outputs of G4 display  
1239 system: 4 z-stacks were recorded in the 2 seconds prior to the experimental stimulus, 2 recorded  
1240 during the 1 second experimental stimulus, followed by another 4 after the experimental stimulus  
1241 had ended.

1242

1243 The time-series of image volumes was converted into a time-series of 2D images by computing a  
1244 mean z-projection. Collapsing the z-stacks minimizes the effect of any brain motion in the z-  
1245 direction. Motion in the x and y directions was corrected using “imregister” in the MATLAB  
1246 image processing toolbox: each image was first gaussian filtered (alpha=3 pixels) to improve  
1247 registration of noisy images, then registered using the ‘multimodal’ metric and ‘rigid’  
1248 transformation. Using this motion-stabilized t-series, an ROI was hand-drawn over the cell/cell-  
1249 population of interest. For LPC1 and LLPC1, an ROI was draw over the entire glomerulus  
1250 population, excluding any additional axon tract that didn’t overlap with the glomerulus. For  
1251 LPC-IN, an ROI was drawn over the area of most dense branching. The mean pixel value within  
1252 the entire ROI was used as the population average fluorescence for each frame. Since each  
1253 experimental condition resulted in 10 values for each experimental condition (4 values before the  
1254 stimulus, 2 during, and 4 after), the fluorescence change ( $\Delta F/F$ ) was calculated by dividing all 10  
1255 fluorescence values by the baseline fluorescence – the mean of the first 4 ‘pre-stimulus’ values.

1256 Peak  $\Delta F/F$  was computed by finding the max value of frames 6-8 in each time-series; values 1-5  
1257 are ignored as they are the pre-stimulus fluorescence change values and frames 9-10 are ignored  
1258 as the peak fluorescence change was never observed more than 2 seconds after the experimental  
1259 stimulus began, due to the temporal dynamics of GCaMP6m and GCaMP6s. Both  $\Delta F/F$  time-  
1260 series and peak  $\Delta F/F$  are plotted as mean of all flies +/- SEM.

1261

1262 To create fluorescence change maps (Fig. S7B), instead of calculating a time-series of  $\Delta F/F$   
1263 using the mean value within an ROI as above, this calculation was performed on every pixel in  
1264 the image independently and the fluorescence change value calculated for each pixel (for each  
1265 set of images per stimulus) was then color-coded by the amount of fluorescence change (as  
1266 indicated by the color-scale bar in Fig. S7B).

1267

1268 *Statistics:*

1269 P-values were calculated using the Mann-Whitney U-test (“ranksum” function in MATLAB).  
1270 We then controlled for the False Discovery Rate (FDR) associated with multiple comparisons  
1271 using the (more conservative) Benjamini-Yekutieli procedure<sup>80</sup> was used to correct for the false  
1272 discovery rate (FDR) associated with multiple comparisons. For the split-GAL4 silencing  
1273 experiments (Fig. 3), 70 comparisons (14 conditions  $\times$  5 genotypes) were made, and for the  
1274 LPC1-double silencing experiments (Fig. S3), 42 comparisons (14 conditions  $\times$  3 genotypes)  
1275 were made. For tethered LPC1-silencing walking experiments, 74 comparisons were made. For  
1276 tethered LPC1-activation walking experiments, 20 comparisons were made. For imaging  
1277 experiments, 12 comparisons each for LPC1 and LLPC1 were made. Statistical significance was  
1278 noted with 1 star for  $p < 0.05$  and FDR  $q = 0.05$ , and with 2 stars for  $p < 0.01$  and FDR  $q = 0.01$ .

1279

1280 *Data and Code availability:*

1281 We will make the data and code used to produce the major results of this study available at the  
1282 time of publication. We will provide the most updated materials to correspond to the final  
1283 version of the manuscript. FlyLight images and split-GAL4 driver lines will be available on the  
1284 FlyLight website: <https://splitgal4.janelia.org/cgi-bin/splitgal4.cgi>. Data will be uploaded to  
1285 FigShare, and analysis and plotting code will be available on <https://github.com/reiserlab>.

1286

1287 **Supplemental Information**

1288

1289 **Table S1. CSV file listing all of the gen 1 GAL4 lines (crossed to *UAS-Shibire<sup>ts1</sup>*) run**  
1290 **through the Fly Vision Box screen, related to Fig. 1, S1. The table lists the summary data**  
1291 **for each sequence of the Box protocol (see Methods for details). The first 729 entries are**  
1292 **for the control genotype that was run throughout the GAL4 line screen.**

1293

1294 **Movie S1: The *Drosophila* surgical preparation for 2-photon calcium imaging.**

1295

1296 **REFERENCES**

- 1297 1. Gibson, J.J. (1950). The perception of the visual world. (Houghton Mifflin).
- 1298 2. Currier, T.A., Pang, M.M., and Clandinin, T.R. (2023). Visual processing in the fly, from  
1299 photoreceptors to behavior. *Genetics*, iyad064. 10.1093/genetics/iyad064.
- 1300 3. Koenderink, J.J., and van Doorn, A.J. (1987). Facts on optic flow. *Biological Cybernetics* 1987 56:4  
1301 56, 247–254. 10.1007/BF00365219.
- 1302 4. Götz, K.G. (1975). The optomotor equilibrium of the *Drosophila* navigation system. *Journal of*  
1303 *Comparative Physiology* ■ A. 10.1007/BF00613835.
- 1304 5. Cruz, T.L., Pérez, S.M., and Chiappe, M.E. (2021). Fast tuning of posture control by visual  
1305 feedback underlies gaze stabilization in walking *Drosophila*. *Current Biology* 31, 4596-4607.e5.  
1306 10.1016/j.cub.2021.08.041.
- 1307 6. Bahl, A., Ammer, G., Schilling, T., and Borst, A. (2013). Object tracking in motion-blind flies.  
1308 *Nature Neuroscience*. 10.1038/nn.3386.
- 1309 7. Hindmarsh Sten, T., Li, R., Otopalik, A., and Ruta, V. (2021). Sexual arousal gates visual  
1310 processing during *Drosophila* courtship. *Nature* 595, 549–553. 10.1038/s41586-021-03714-w.
- 1311 8. Tammero, L.F., and Dickinson, M.H. (2002). The influence of visual landscape on the free flight  
1312 behavior of the fruit fly *Drosophila melanogaster*. *The Journal of experimental biology*.
- 1313 9. Tanaka, R., and Clark, D.A. (2022). Neural mechanisms to exploit positional geometry for  
1314 collision avoidance. *Current Biology* 32, 2357-2374.e6. 10.1016/j.cub.2022.04.023.
- 1315 10. Shinomiya, K., Huang, G., Lu, Z., Parag, T., Xu, C.S., Aniceto, R., Ansari, N., Cheatham, N., Lauchie,  
1316 S., Neace, E., et al. (2019). Comparisons between the ON- and OFF-edge motion pathways in the  
1317 *Drosophila* brain. *eLife*. 10.7554/eLife.40025.
- 1318 11. Haag, J., Mishra, A., and Borst, A. (2017). A common directional tuning mechanism of *Drosophila*  
1319 motion-sensing neurons in the ON and in the OFF pathway. *eLife*. 10.7554/elife.29044.
- 1320 12. Leong, J.C.S., Esch, J.J., Poole, B., Ganguli, S., and Clandinin, T.R. (2016). Direction Selectivity in  
1321 *Drosophila* Emerges from Preferred-Direction Enhancement and Null-Direction Suppression. *Journal of*  
1322 *Neuroscience* 36, 8078–8092. 10.1523/JNEUROSCI.1272-16.2016.
- 1323 13. Strother, J.A., Wu, S.-T., Wong, A.M., Nern, A., Rogers, E.M., Le, J.Q., Rubin, G.M., and Reiser,  
1324 M.B. (2017). The Emergence of Directional Selectivity in the Visual Motion Pathway of *Drosophila*.  
1325 *Neuron* 94, 168-182.e10. 10.1016/j.neuron.2017.03.010.
- 1326 14. Salazar-Gatzimas, E., Chen, J., Creamer, M.S., Mano, O., Mandel, H.B., Matulis, C.A., Pottackal, J.,  
1327 and Clark, D.A. (2016). Direct Measurement of Correlation Responses in *Drosophila* Elementary Motion  
1328 Detectors Reveals Fast Timescale Tuning. *Neuron*. 10.1016/j.neuron.2016.09.017.

- 1329 15. Gruntman, E., Romani, S., and Reiser, M.B. (2018). Simple integration of fast excitation and  
1330 offset, delayed inhibition computes directional selectivity in *Drosophila*. *Nature Neuroscience* *21*, 250–  
1331 257. [10.1038/s41593-017-0046-4](https://doi.org/10.1038/s41593-017-0046-4).
- 1332 16. Fischbach, K.-F., and Dittrich, A.P.M. (1989). The optic lobe of *Drosophila melanogaster*. I. A  
1333 Golgi analysis of wild-type structure. *Cell and Tissue Research* *258*. [10.1007/BF00218858](https://doi.org/10.1007/BF00218858).
- 1334 17. Maisak, M.S., Haag, J., Ammer, G., Serbe, E., Meier, M., Leonhardt, A., Schilling, T., Bahl, A.,  
1335 Rubin, G.M., Nern, A., et al. (2013). A directional tuning map of *Drosophila* elementary motion  
1336 detectors. *Nature* *500*, 212–216. [10.1038/nature12320](https://doi.org/10.1038/nature12320).
- 1337 18. Shinomiya, K., Nern, A., Meinertzhagen, I.A., Plaza, S.M., and Reiser, M.B. (2022). Neuronal  
1338 circuits integrating visual motion information in *Drosophila melanogaster*. *Current Biology*.  
1339 [10.1016/j.cub.2022.06.061](https://doi.org/10.1016/j.cub.2022.06.061).
- 1340 19. Takemura, S.Y., Bharioke, A., Lu, Z., Nern, A., Vitaladevuni, S., Rivlin, P.K., Katz, W.T., Olbris, D.J.,  
1341 Plaza, S.M., Winston, P., et al. (2013). A visual motion detection circuit suggested by *Drosophila*  
1342 connectomics. *Nature*. [10.1038/nature12450](https://doi.org/10.1038/nature12450).
- 1343 20. Tuthill, J., Nern, A., Holtz, S., Rubin, G., and Reiser, M.B. (2013). Contributions of the 12 Neuron  
1344 Classes in the Fly Lamina to Motion Vision. *Neuron* *79*. [10.1016/j.neuron.2013.05.024](https://doi.org/10.1016/j.neuron.2013.05.024).
- 1345 21. Silies, M., Gohl, D.M., and Clandinin, T.R. (2014). Motion-Detecting Circuits in Flies: Coming into  
1346 View. *Annual Review of Neuroscience* *37*, 307–327. [10.1146/annurev-neuro-071013-013931](https://doi.org/10.1146/annurev-neuro-071013-013931).
- 1347 22. Hausen, K. (1984). The Lobula-Complex of the Fly: Structure, Function and Significance in Visual  
1348 Behaviour. In *Photoreception and Vision in Invertebrates* (Springer US), pp. 523–559. [10.1007/978-1-4613-2743-1\\_15](https://doi.org/10.1007/978-1-4613-2743-1_15).
- 1350 23. Krapp, H.G., Hengstenberg, B., and Hengstenberg, R. (1998). Dendritic Structure and Receptive-  
1351 Field Organization of Optic Flow Processing Interneurons in the Fly. *Journal of Neurophysiology* *79*,  
1352 1902–1917. [10.1152/jn.1998.79.4.1902](https://doi.org/10.1152/jn.1998.79.4.1902).
- 1353 24. Krapp, H.G., and Hengstenberg, R. (1996). Estimation of self-motion by optic flow processing in  
1354 single visual interneurons. *Nature* *384*, 463–466. [10.1038/384463a0](https://doi.org/10.1038/384463a0).
- 1355 25. Scott, E.K., Raabe, T., and Luo, L. (2002). Structure of the vertical and horizontal system neurons  
1356 of the lobula plate in *Drosophila*. *Journal of Comparative Neurology*. [10.1002/cne.10467](https://doi.org/10.1002/cne.10467).
- 1357 26. Busch, C., Borst, A., and Mauss, A.S. (2018). Bi-directional Control of Walking Behavior by  
1358 Horizontal Optic Flow Sensors. *Current Biology*. [10.1016/j.cub.2018.11.010](https://doi.org/10.1016/j.cub.2018.11.010).
- 1359 27. Kim, A.J., Fenk, L.M., Lyu, C., and Maimon, G. (2017). Quantitative Predictions Orchestrate Visual  
1360 Signaling in *Drosophila*. *Cell*. [10.1016/j.cell.2016.12.005](https://doi.org/10.1016/j.cell.2016.12.005).
- 1361 28. Huston, S.J., and Krapp, H.G. (2008). Visuomotor transformation in the fly gaze stabilization  
1362 system. *PLoS Biology*. [10.1371/journal.pbio.0060173](https://doi.org/10.1371/journal.pbio.0060173).

- 1363 29. Strausfeld, N.J., Seyan, H.S., and Milde, J.J. (1987). The neck motor system of the fly *Calliphora*  
1364 *erythrocephala* - I. Muscles and motor neurons. *Journal of Comparative Physiology A*.  
1365 10.1007/BF00609727.
- 1366 30. Budick, S.A., Reiser, M.B., and Dickinson, M.H. (2007). The role of visual and mechanosensory  
1367 cues in structuring forward flight in *Drosophila melanogaster*. *Journal of Experimental Biology* *210*.  
1368 10.1242/jeb.006502.
- 1369 31. Reiser, M.B., and Dickinson, M.H. (2013). Visual motion speed determines a behavioral switch  
1370 from forward flight to expansion avoidance in *Drosophila*. *Journal of Experimental Biology* *216*.  
1371 10.1242/jeb.074732.
- 1372 32. Zhu, Y., Nern, A., Zipursky, S.L., and Frye, M.A. (2009). Peripheral visual circuits functionally  
1373 segregate motion and phototaxis behaviors in the fly. *Current biology : CB* *19*, 613–619.  
1374 10.1016/j.cub.2009.02.053.
- 1375 33. Creamer, M.S., Mano, O., and Clark, D.A. (2018). Visual Control of Walking Speed in *Drosophila*.  
1376 *Neuron* *100*, 1460-1473.e6. 10.1016/j.neuron.2018.10.028.
- 1377 34. Longden, K.D., Wicklein, M., Hardcastle, B.J., Huston, S.J., and Krapp, H.G. (2017). Spike Burst  
1378 Coding of Translatory Optic Flow and Depth from Motion in the Fly Visual System. *Current biology : CB*  
1379 *27*, 3225-3236.e3. 10.1016/j.cub.2017.09.044.
- 1380 35. Gilbert, C., and Strausfeld, N.J. (1992). Small-field neurons associated with oculomotor and  
1381 optomotor control in muscoid flies: Functional organization. *The Journal of Comparative Neurology* *316*,  
1382 72–86. 10.1002/cne.903160107.
- 1383 36. Scheffer, L.K., Xu, C.S., Januszewski, M., Lu, Z., Takemura, S.Y., Hayworth, K.J., Huang, G.B.,  
1384 Shinomiya, K., Maitin-Shepard, J., Berg, S., et al. (2020). A connectome and analysis of the adult  
1385 *Drosophila* central brain. *eLife* *9*, 1–74. 10.7554/ELIFE.57443.
- 1386 37. St Johnston, D. (2002). The art and design of genetic screens: *Drosophila melanogaster*. *Nat Rev*  
1387 *Genet* *3*, 176–188. 10.1038/nrg751.
- 1388 38. Kim, S., Tellez, K., Buchan, G., and Lebestky, T. (2016). Fly Stampede 2.0: A Next Generation  
1389 Optomotor Assay for Walking Behavior in *Drosophila Melanogaster*. *Frontiers in Molecular Neuroscience*  
1390 *9*, 148. 10.3389/fnmol.2016.00148.
- 1391 39. Gao, S., Takemura, S. ya, Ting, C.Y., Huang, S., Lu, Z., Luan, H., Rister, J., Thum, A.S., Yang, M.,  
1392 Hong, S.T., et al. (2008). The Neural Substrate of Spectral Preference in *Drosophila*. *Neuron* *60*, 328–342.  
1393 10.1016/J.NEURON.2008.08.010.
- 1394 40. Benzer, S. (1967). BEHAVIORAL MUTANTS OF *Drosophila* ISOLATED BY COUNTERCURRENT  
1395 DISTRIBUTION. *Proceedings of the National Academy of Sciences* *58*, 1112–1119.  
1396 10.1073/PNAS.58.3.1112.
- 1397 41. Isaacson, M., Ferguson, L., Loesche, F., Ganguly, I., Chen, J., Chiu, A., Liu, J., Dickson, W., and  
1398 Reiser, M. (2022). A high-speed, modular display system for diverse neuroscience applications.  
1399 2022.08.02.502550. 10.1101/2022.08.02.502550.



- 1400 42. Tuthill, J.C., Chiappe, M.E., and Reiser, M.B. (2011). Neural correlates of illusory motion  
1401 perception in *Drosophila*. *Proceedings of the National Academy of Sciences of the United States of*  
1402 *America* *108*. 10.1073/pnas.1100062108.
- 1403 43. Clark, D.A., Bursztyn, L., Horowitz, M.A., Schnitzer, M.J., and Clandinin, T.R. (2011). Defining the  
1404 Computational Structure of the Motion Detector in *Drosophila*. *Neuron*. 10.1016/j.neuron.2011.05.023.
- 1405 44. Jenett, A., Rubin, G.M., Ngo, T.-T.B., Shepherd, D., Murphy, C., Dionne, H., Pfeiffer, B.D.,  
1406 Cavallaro, A., Hall, D., Jeter, J., et al. (2012). A GAL4-Driver Line Resource for *Drosophila* Neurobiology.  
1407 *Cell Reports* *2*, 991–1001. 10.1016/j.celrep.2012.09.011.
- 1408 45. Kitamoto, T. (2001). Conditional modification of behavior in *Drosophila* by targeted expression  
1409 of a temperature-sensitive shibire allele in defined neurons. *Journal of neurobiology* *47*, 81–92.
- 1410 46. Robie, A.A., Hirokawa, J., Edwards, A.W., Umayam, L.A., Lee, A., Phillips, M.L., Card, G.M., Korff,  
1411 W., Rubin, G.M., Simpson, J.H., et al. (2017). Mapping the Neural Substrates of Behavior. *Cell* *170*.  
1412 10.1016/j.cell.2017.06.032.
- 1413 47. Wu, M., Nern, A., Ryan Williamson, W., Morimoto, M.M., Reiser, M.B., Card, G.M., and Rubin,  
1414 G.M. (2016). Visual projection neurons in the *Drosophila* lobula link feature detection to distinct  
1415 behavioral programs. *eLife* *5*. 10.7554/eLife.21022.
- 1416 48. Panser, K., Tirian, L., Schulze, F., Villalba, S., Jefferis, G.S.X.E., Bühler, K., and Straw, A.D. (2016).  
1417 Automatic Segmentation of *Drosophila* Neural Compartments Using GAL4 Expression Data Reveals  
1418 Novel Visual Pathways. *Current Biology* *26*, 1943–1954. 10.1016/j.cub.2016.05.052.
- 1419 49. Otsuna, H., and Ito, K. (2006). Systematic analysis of the visual projection neurons of *Drosophila*  
1420 *melanogaster*. I. Lobula-specific pathways. *Journal of Comparative Neurology* *497*, 928–958.  
1421 10.1002/CNE.21015.
- 1422 50. Klapoetke, N.C., Nern, A., Rogers, E.M., Rubin, G.M., Reiser, M.B., and Card, G.M. (2022). A  
1423 functionally ordered visual feature map in the *Drosophila* brain. *Neuron* *110*, 1700–1711.e6.  
1424 10.1016/j.neuron.2022.02.013.
- 1425 51. Klapoetke, N.C., Nern, A., Peek, M.Y., Rogers, E.M., Breads, P., Rubin, G.M., Reiser, M.B., and  
1426 Card, G.M. (2017). Ultra-selective looming detection from radial motion opponency. *Nature* *551*, 237–  
1427 241. 10.1038/nature24626.
- 1428 52. Luan, H., Peabody, N.C., Vinson, C.R., and White, B.H. (2006). Refined spatial manipulation of  
1429 neuronal function by combinatorial restriction of transgene expression. *Neuron* *52*, 425–436.
- 1430 53. Pfeiffer, B.D., Ngo, T.-T.B., Hibbard, K.L., Murphy, C., Jenett, A., Truman, J.W., and Rubin, G.M.  
1431 (2010). Refinement of Tools for Targeted Gene Expression in *Drosophila*. *Genetics* *186*, 735–755.  
1432 10.1534/genetics.110.119917.
- 1433 54. Davis, F.P., Nern, A., Picard, S., Reiser, M.B., Rubin, G.M., Eddy, S.R., and Henry, G.L. (2020). A  
1434 genetic, genomic, and computational resource for exploring neural circuit function. *eLife*.  
1435 10.7554/elife.50901.

- 1436 55. Seelig, J.D., Chiappe, M.E., Lott, G.K., Dutta, A., Osborne, J.E., Reiser, M.B., and Jayaraman, V.  
1437 (2010). Two-photon calcium imaging from head-fixed *Drosophila* during optomotor walking behavior.  
1438 *Nature Methods* 7. 10.1038/nmeth.1468.
- 1439 56. Reiser, M.B., and Dickinson, M.H. (2008). A modular display system for insect behavioral  
1440 neuroscience. *Journal of Neuroscience Methods* 167. 10.1016/j.jneumeth.2007.07.019.
- 1441 57. Lyu, C., Abbott, L.F., and Maimon, G. (2022). Building an allocentric travelling direction signal via  
1442 vector computation. *Nature* 601, 92–97. 10.1038/s41586-021-04067-0.
- 1443 58. Klapoetke, N.C., Murata, Y., Kim, S.S., Pulver, S.R., Birdsey-Benson, A., Cho, Y.K., Morimoto, T.K.,  
1444 Chuong, A.S., Carpenter, E.J., Tian, Z., et al. (2014). Independent optical excitation of distinct neural  
1445 populations. *Nature methods*. 10.1038/nmeth.2836.
- 1446 59. Chen, T.-W., Wardill, T.J., Sun, Y., Pulver, S.R., Renninger, S.L., Baohan, A., Schreiter, E.R., Kerr,  
1447 R.A., Orger, M.B., Jayaraman, V., et al. (2013). Ultrasensitive fluorescent proteins for imaging neuronal  
1448 activity. *Nature* 499, 295–300. 10.1038/nature12354.
- 1449 60. Zhao, A., Gruntman, E., Nern, A., Iyer, N.A., Rogers, E.M., Koskela, S., Siwanowicz, I., Dreher, M.,  
1450 Flynn, M.A., Laughland, C.W., et al. (2022). Eye structure shapes neuron function in *Drosophila* motion  
1451 vision. 2022.12.14.520178. 10.1101/2022.12.14.520178.
- 1452 61. Mauss, A.S., Pankova, K., Arenz, A., Nern, A., Rubin, G.M., and Borst, A. (2015). Neural Circuit to  
1453 Integrate Opposing Motions in the Visual Field. *Cell* 162, 351–362. 10.1016/J.CELL.2015.06.035.
- 1454 62. Karmeier, K., van Hateren, J.H., Kern, R., and Egelhaaf, M. (2006). Encoding of Naturalistic Optic  
1455 Flow by a Population of Blowfly Motion-Sensitive Neurons. *Journal of Neurophysiology* 96, 1602–1614.  
1456 10.1152/jn.00023.2006.
- 1457 63. Zheng, Z., Lauritzen, J.S., Perlman, E., Robinson, C.G., Nichols, M., Milkie, D., Torrens, O., Price,  
1458 J., Fisher, C.B., Sharifi, N., et al. (2018). A Complete Electron Microscopy Volume of the Brain of Adult  
1459 *Drosophila melanogaster*. *Cell* 174, 730-743.e22. 10.1016/J.CELL.2018.06.019.
- 1460 64. Reiser, M.B., Humbert, J.S., Dunlop, M.J., Vecchio, D.D., Murray, R.M., and Dickinson, M.H.  
1461 (2004). Vision as a compensatory mechanism for disturbance rejection in upwind flight. In *Proceedings*  
1462 *of the American Control Conference*.
- 1463 65. Nern, A., Pfeiffer, B.D., and Rubin, G.M. (2015). Optimized tools for multicolor stochastic labeling  
1464 reveal diverse stereotyped cell arrangements in the fly visual system. *Proceedings of the National*  
1465 *Academy of Sciences* 112, E2967–E2976. 10.1073/pnas.1506763112.
- 1466 66. Gruntman, E., Romani, S., and Reiser, M.B. (2019). The computation of directional selectivity in  
1467 the *Drosophila* OFF motion pathway. *bioRxiv*. 10.1101/721902.
- 1468 67. Buchner, E. (1971). *Dunkelanregung des stationaeren Flugs der Fruchtfliege Drosophila*.
- 1469 68. Dickson, W.B., Straw, A.D., and Dickinson, M.H. (2008). Integrative Model of *Drosophila* Flight.  
1470 *AIAA Journal* 46, 2150–2164. 10.2514/1.29862.

- 1471 69. Meissner, G.W., Nern, A., Singer, R.H., Wong, A.M., Malkesman, O., and Long, X. (2019).  
1472 Mapping neurotransmitter identity in the whole-mount drosophila brain using multiplex high-  
1473 throughput fluorescence in situ hybridization. *Genetics*. 10.1534/genetics.118.301749.
- 1474 70. Dionne, H., Hibbard, K.L., Cavallaro, A., Kao, J.C., and Rubin, G.M. (2018). Genetic reagents for  
1475 making split-GAL4 lines in *Drosophila*. *Genetics*. 10.1534/genetics.118.300682.
- 1476 71. Tirian, L., and Dickson, B.J. (2017). The VT GAL4, LexA, and split-GAL4 driver line collections for  
1477 targeted expression in the *Drosophila* nervous system. *bioRxiv*. 10.1101/198648.
- 1478 72. Duffy, J.B. (2002). GAL4 system in *Drosophila*: A fly geneticist's swiss army knife. *genesis* 34, 1-  
1479 15. 10.1002/gene.10150.
- 1480 73. Schindelin, J., Arganda-Carreras, I., Frise, E., Kaynig, V., Longair, M., Pietzsch, T., Preibisch, S.,  
1481 Rueden, C., Saalfeld, S., Schmid, B., et al. (2012). Fiji: an open-source platform for biological-image  
1482 analysis. *Nat Methods* 9, 676-682. 10.1038/nmeth.2019.
- 1483 74. Wan, Y., Otsuna, H., Holman, H.A., Bagley, B., Ito, M., Lewis, A.K., Colasanto, M., Kardon, G., Ito,  
1484 K., and Hansen, C. (2017). FluoRender: joint freehand segmentation and visualization for many-channel  
1485 fluorescence data analysis. *BMC Bioinformatics* 18, 280. 10.1186/s12859-017-1694-9.
- 1486 75. Bogovic, J.A., Otsuna, H., Heinrich, L., Ito, M., Jeter, J., Meissner, G., Nern, A., Colonell, J.,  
1487 Malkesman, O., Ito, K., et al. (2020). An unbiased template of the *Drosophila* brain and ventral nerve  
1488 cord. *PLOS ONE* 15, e0236495. 10.1371/journal.pone.0236495.
- 1489 76. Loesche, F., and Reiser, M.B. (2021). An Inexpensive, High-Precision, Modular Spherical  
1490 Treadmill Setup Optimized for *Drosophila* Experiments. *Frontiers in Behavioral Neuroscience* 15, 138.  
1491 10.3389/FNBEH.2021.689573/BIBTEX.
- 1492 77. Demerec, M. (1950). *Biology of Drosophila* (Hafner Press).
- 1493 78. Branson, K., Robie, A.A., Bender, J., Perona, P., and Dickinson, M.H. (2009). High-throughput  
1494 ethomics in large groups of *Drosophila*. *Nature Methods* 6, 451-457. 10.1038/nmeth.1328.
- 1495 79. Lebestky, T., Chang, J.-S.C., Dankert, H., Zelnik, L., Kim, Y.-C., Han, K.-A., Wolf, F.W., Perona, P.,  
1496 and Anderson, D.J. (2009). Two Different Forms of Arousal in *Drosophila* Are Oppositely Regulated by  
1497 the Dopamine D1 Receptor Ortholog DopR via Distinct Neural Circuits. *Neuron* 64, 522-536.  
1498 10.1016/j.neuron.2009.09.031.
- 1499 80. Benjamini, Y., and Yekutieli, D. (2001). The control of the false discovery rate in multiple testing  
1500 under dependency. *The Annals of Statistics* 29, 1165-1188. 10.1214/aos/1013699998.

1501
